# Supplementary material
Source: PubMed Central journal article supplement (PMC6466822)

## Supporting information 2

### EC18 AS A TOOL TO UNDERSTAND THE ROLE OF HCN4 CHANNELS IN MEDIATING HYPERPOLARIZATION-ACTIVATED CURRENT IN TISSUES

Maria Novella Romanelli,<sup>a\*</sup> Martina Del Lungo,<sup>a</sup> Luca Guandalini,<sup>a†</sup> Mehrnoush Zobeiri,<sup>b</sup> András Gyökerez,<sup>c</sup> Tamás Árpádfy-Lovas,<sup>c</sup> Istvan Koncz,<sup>c</sup> Laura Sartiani,<sup>a</sup> Gianluca Bartolucci,<sup>a</sup> Silvia Dei,<sup>a</sup> Dina Manetti,<sup>a</sup> Elisabetta Teodori,<sup>a</sup> Thomas Budde,<sup>b</sup> Elisabetta Cerbai.<sup>a</sup>

<sup>a</sup> Department of Neurosciences, Psychology, Drug Research and Child Health (NeuroFarBa), University of Florence, Florence, Italy

<sup>b</sup> Institute of Physiology I, Westfälische Wilhelms-University Münster, Germany

<sup>c</sup> Department of Pharmacology and Pharmacotherapy, University of Szeged, Szeged, Hungary.

\*corresponding author: [novella.romanelli@unifi.it](mailto:novella.romanelli@unifi.it)

† present address: Stabilimento Chimico Farmaceutico Militare (SCFM), Agenzia Industrie Difesa (AID), Ministero della Difesa, Via Reginaldo Giuliani, 201. 50141 FIRENZE

#### Content:

<sup>1</sup>H-NMR and <sup>13</sup>C-NMR spectra of selected compounds (Figures S4-S18)

Chromatographic profiles of LC-DAD analysis of compounds **3a-3g** (Figures S19-S25)

Figure S4:  $^1\text{H}$ -MMR of *cis*-4 ( $\text{CDCl}_3$ )

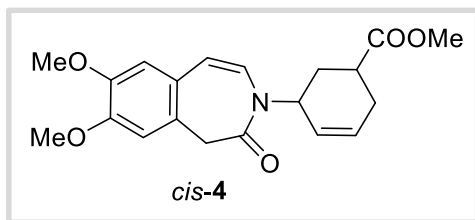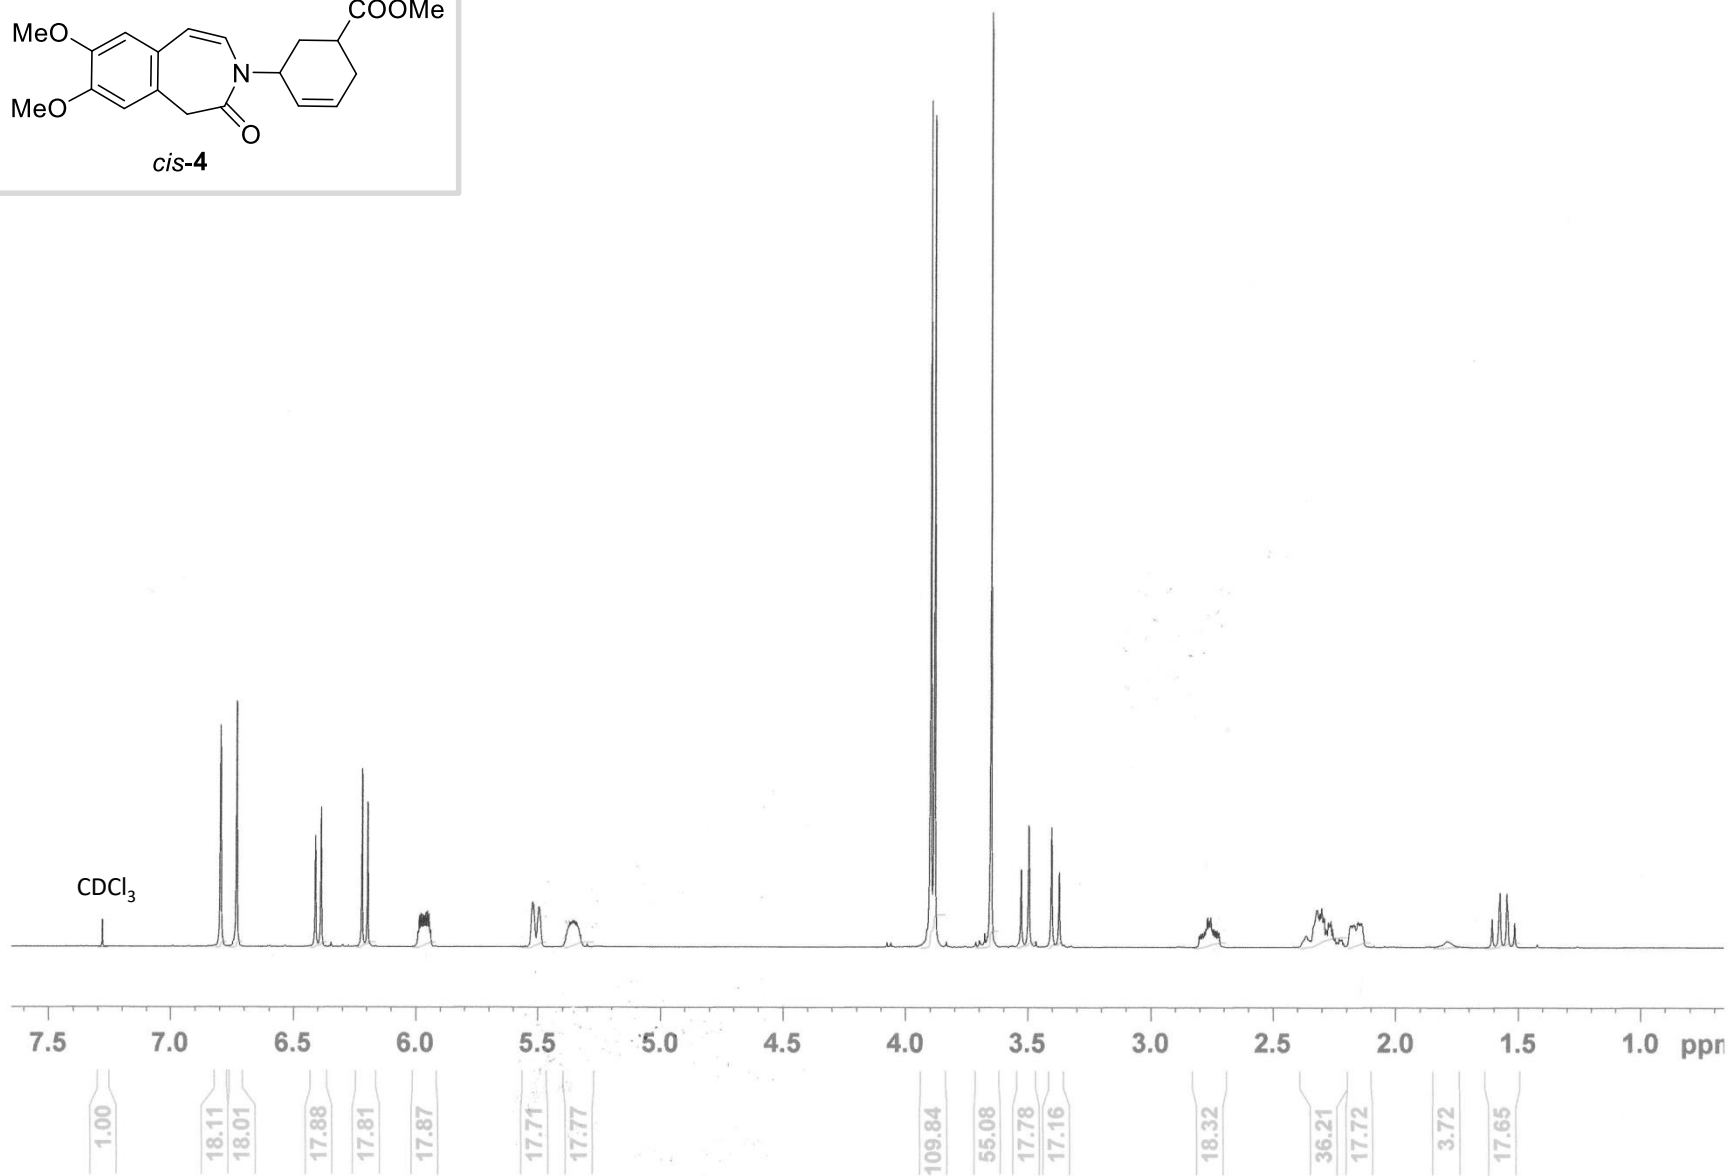

Figure S5: <sup>1</sup>H-MMR of *cis*-5 (CDCl<sub>3</sub>)

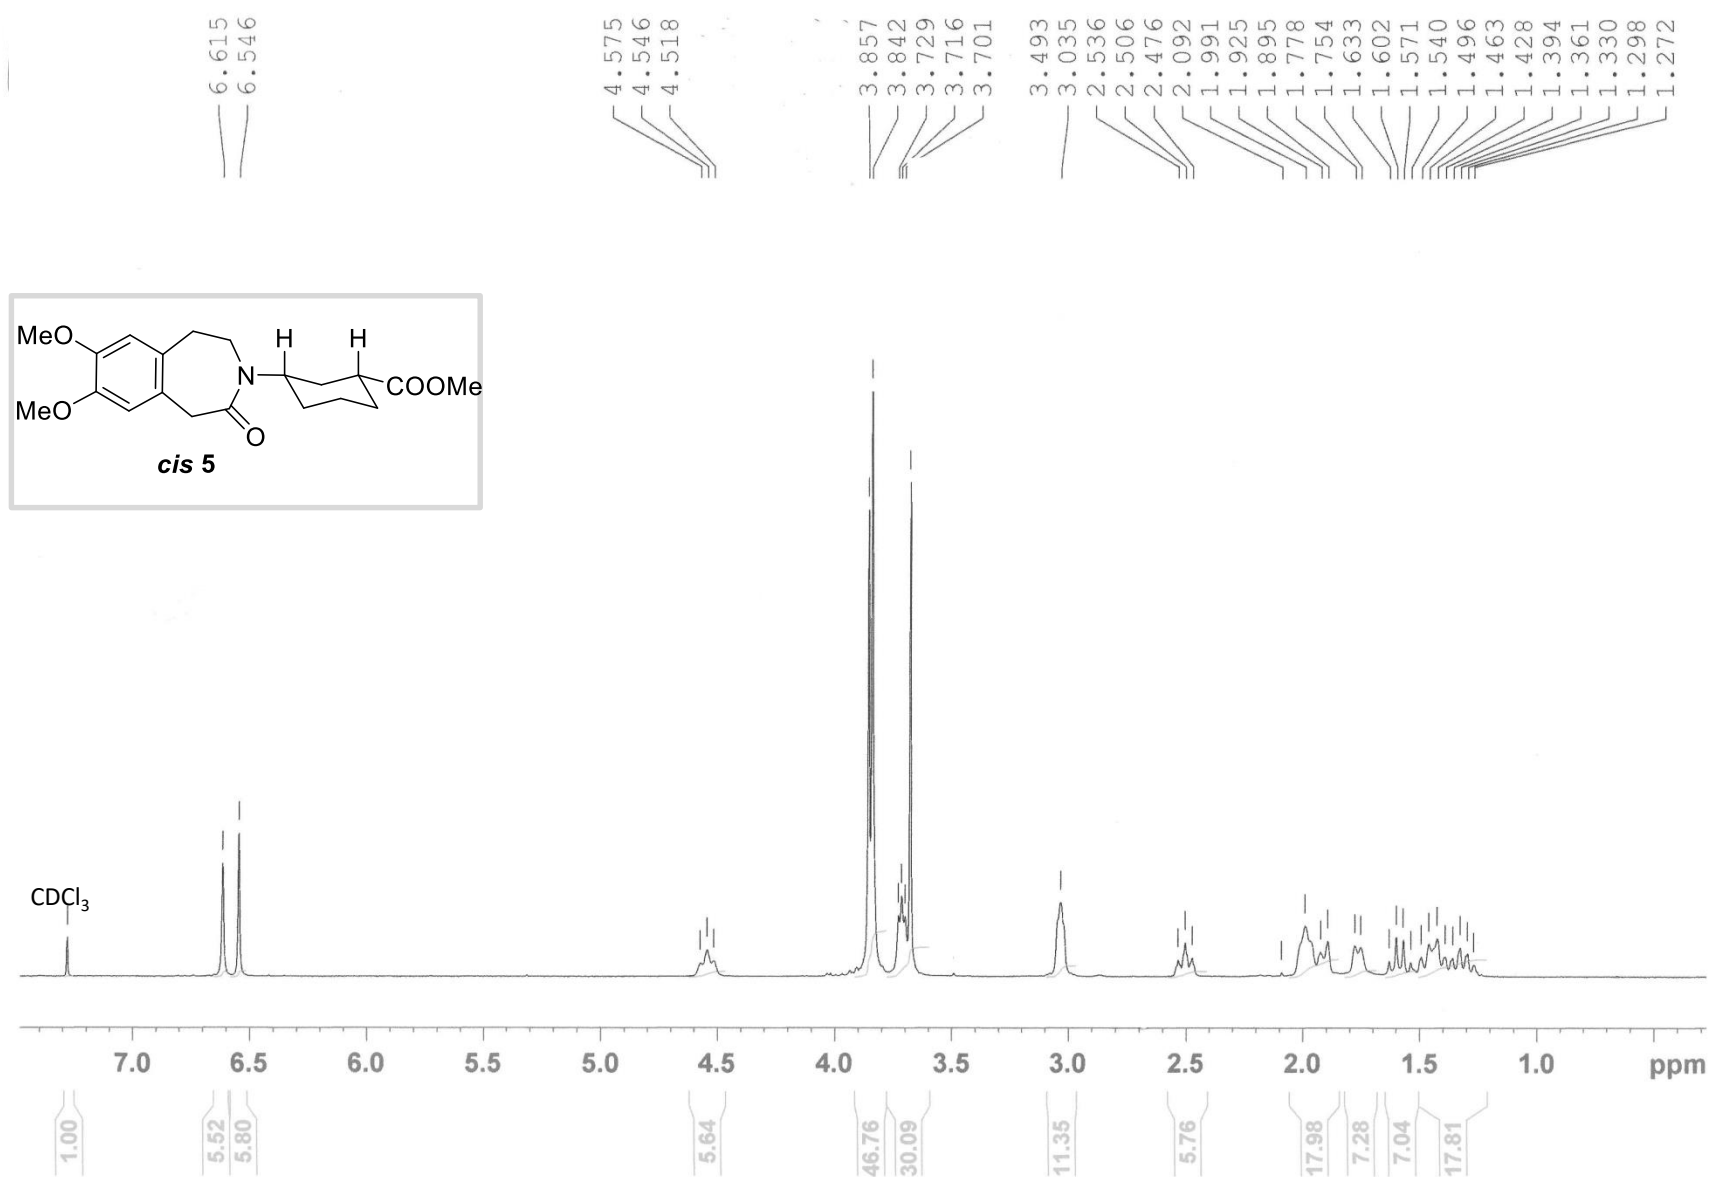

Figure S6:  $^{13}\text{C}$ -MMR of *cis*-5 ( $\text{CDCl}_3$ )

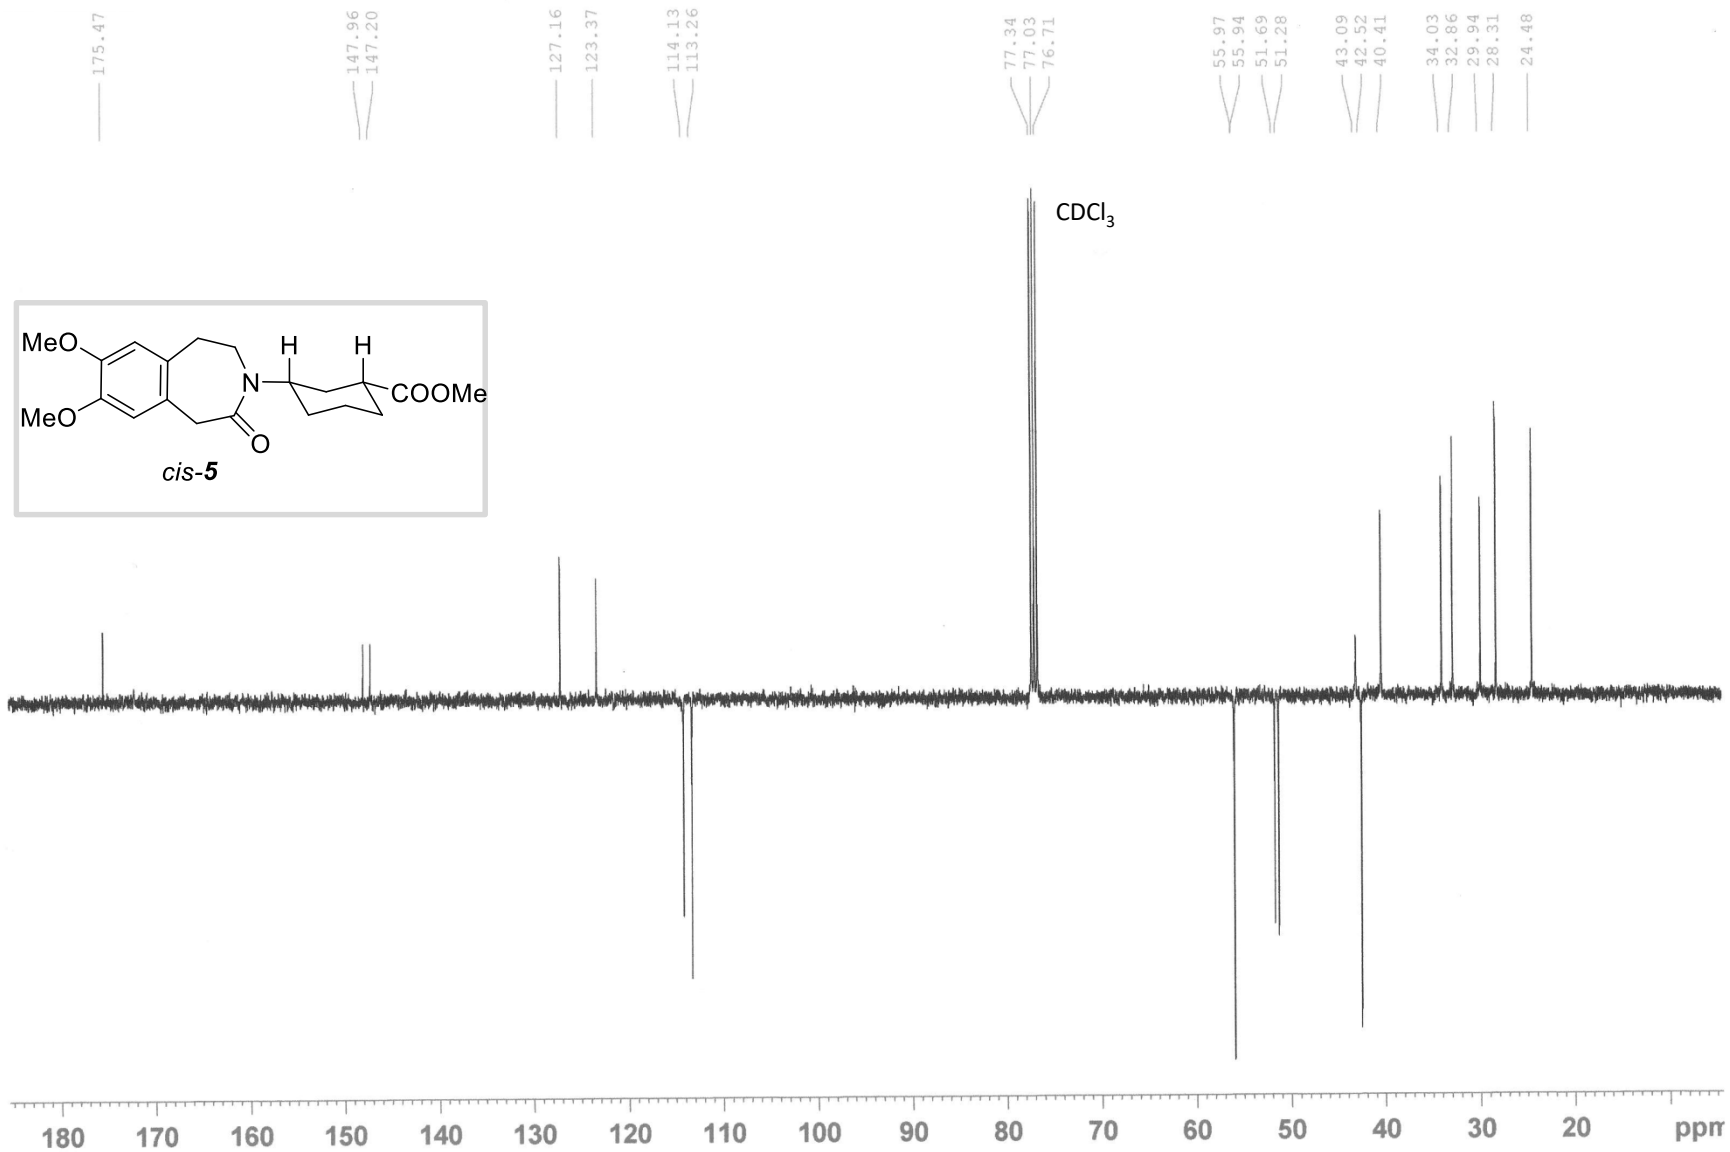

Figure S7:  $^1\text{H}$ -MMR of *cis-trans*-5 ( $\text{CDCl}_3$ )

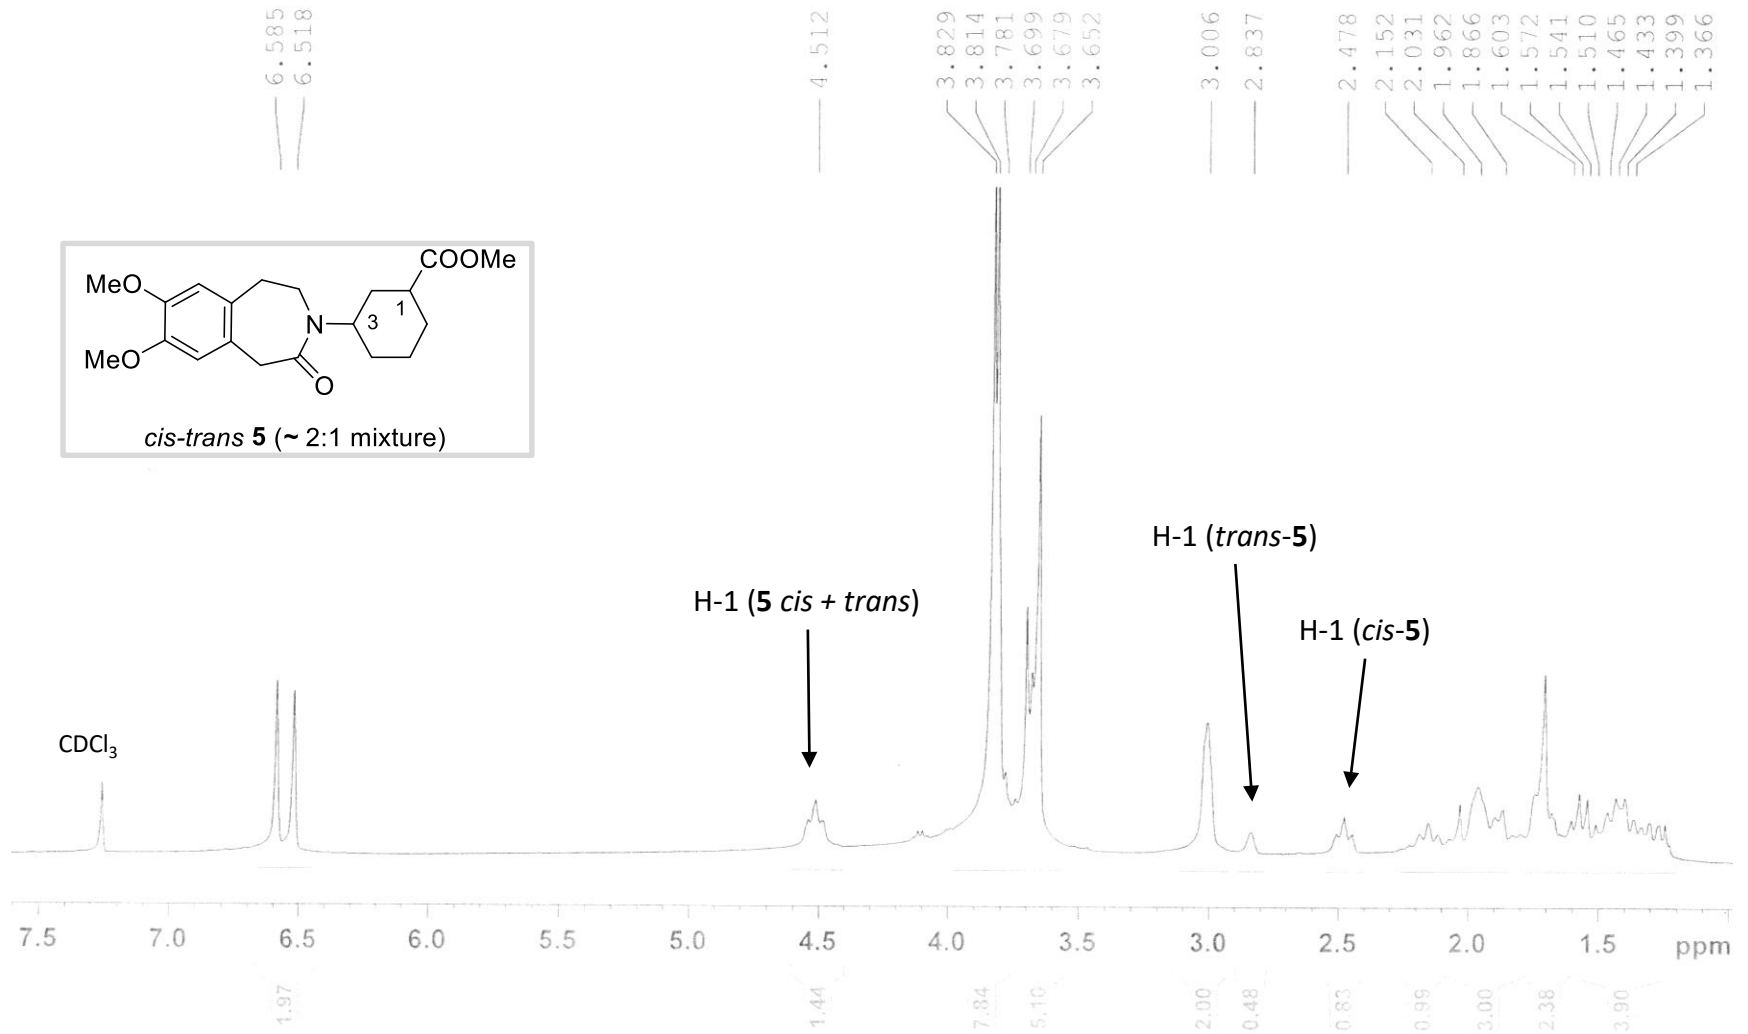

Figure S8:  $^1\text{H}$ -MMR of **6**( $\text{CDCl}_3$ )

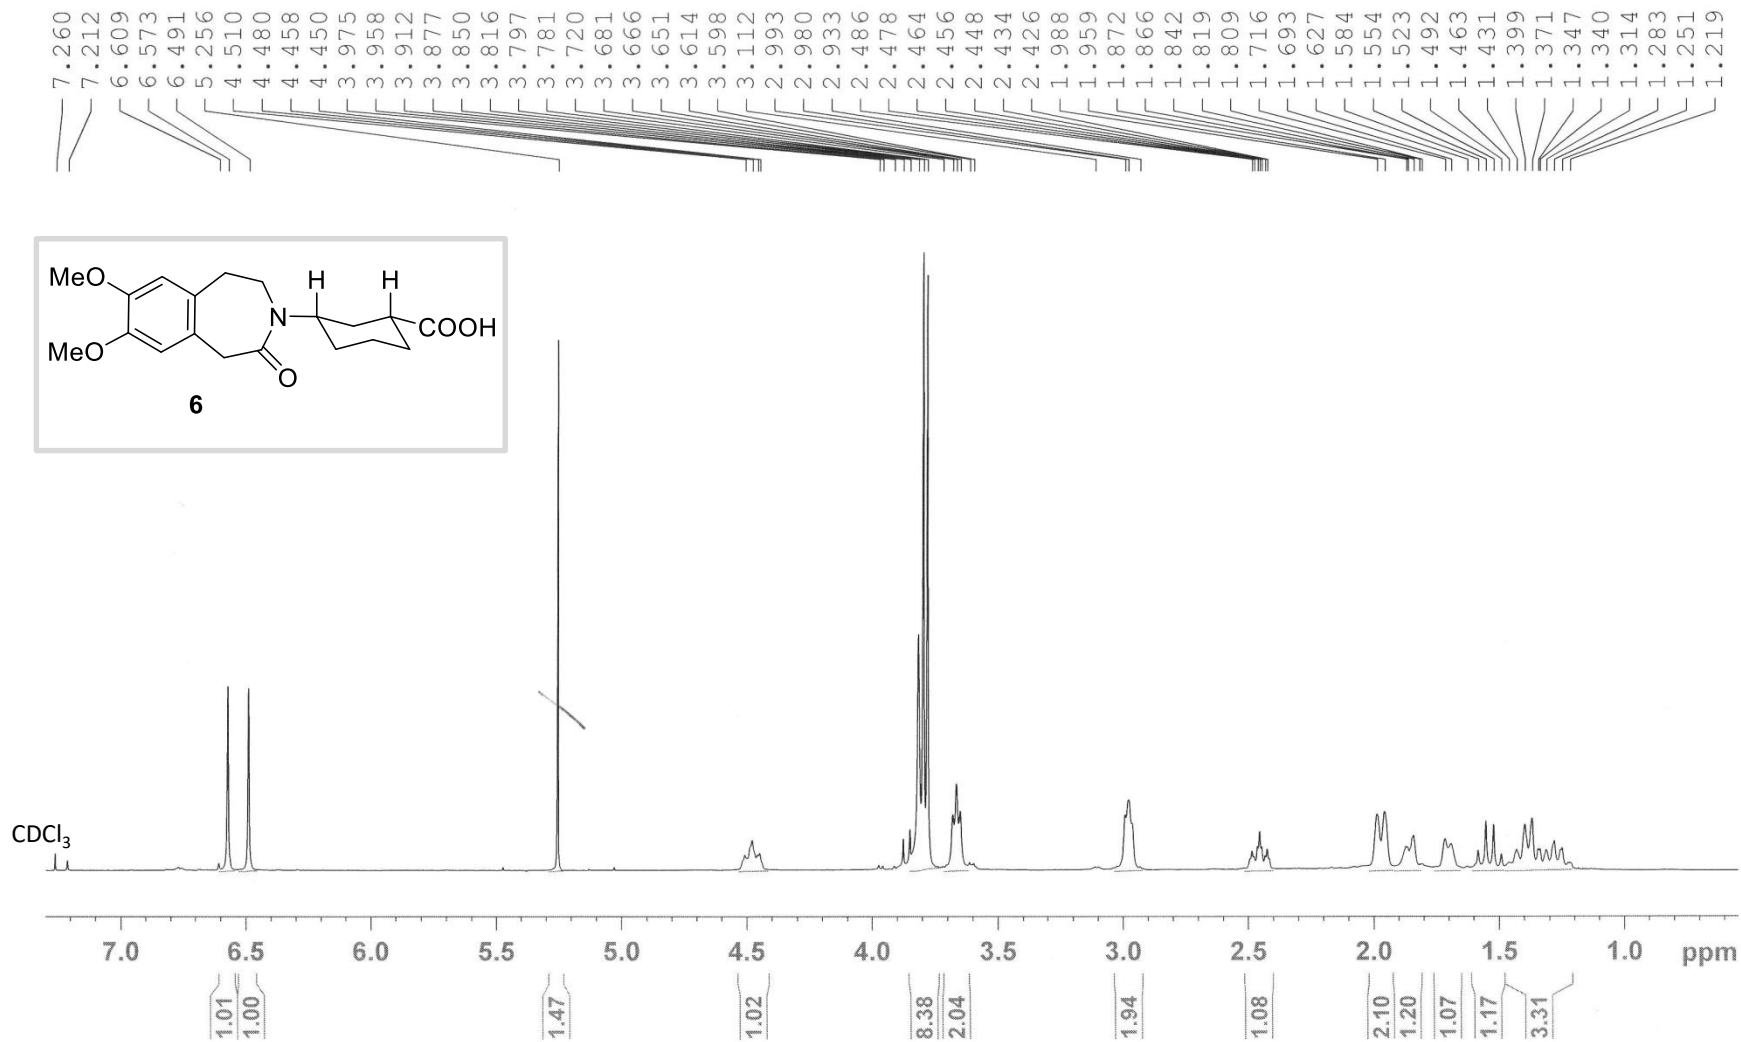

Figure S9:  $^1\text{H}$ -MMR of 7( $\text{CDCl}_3$ )

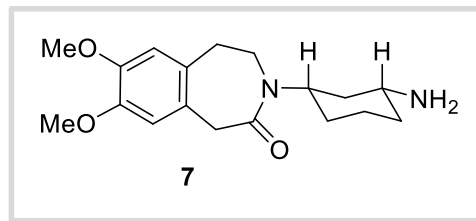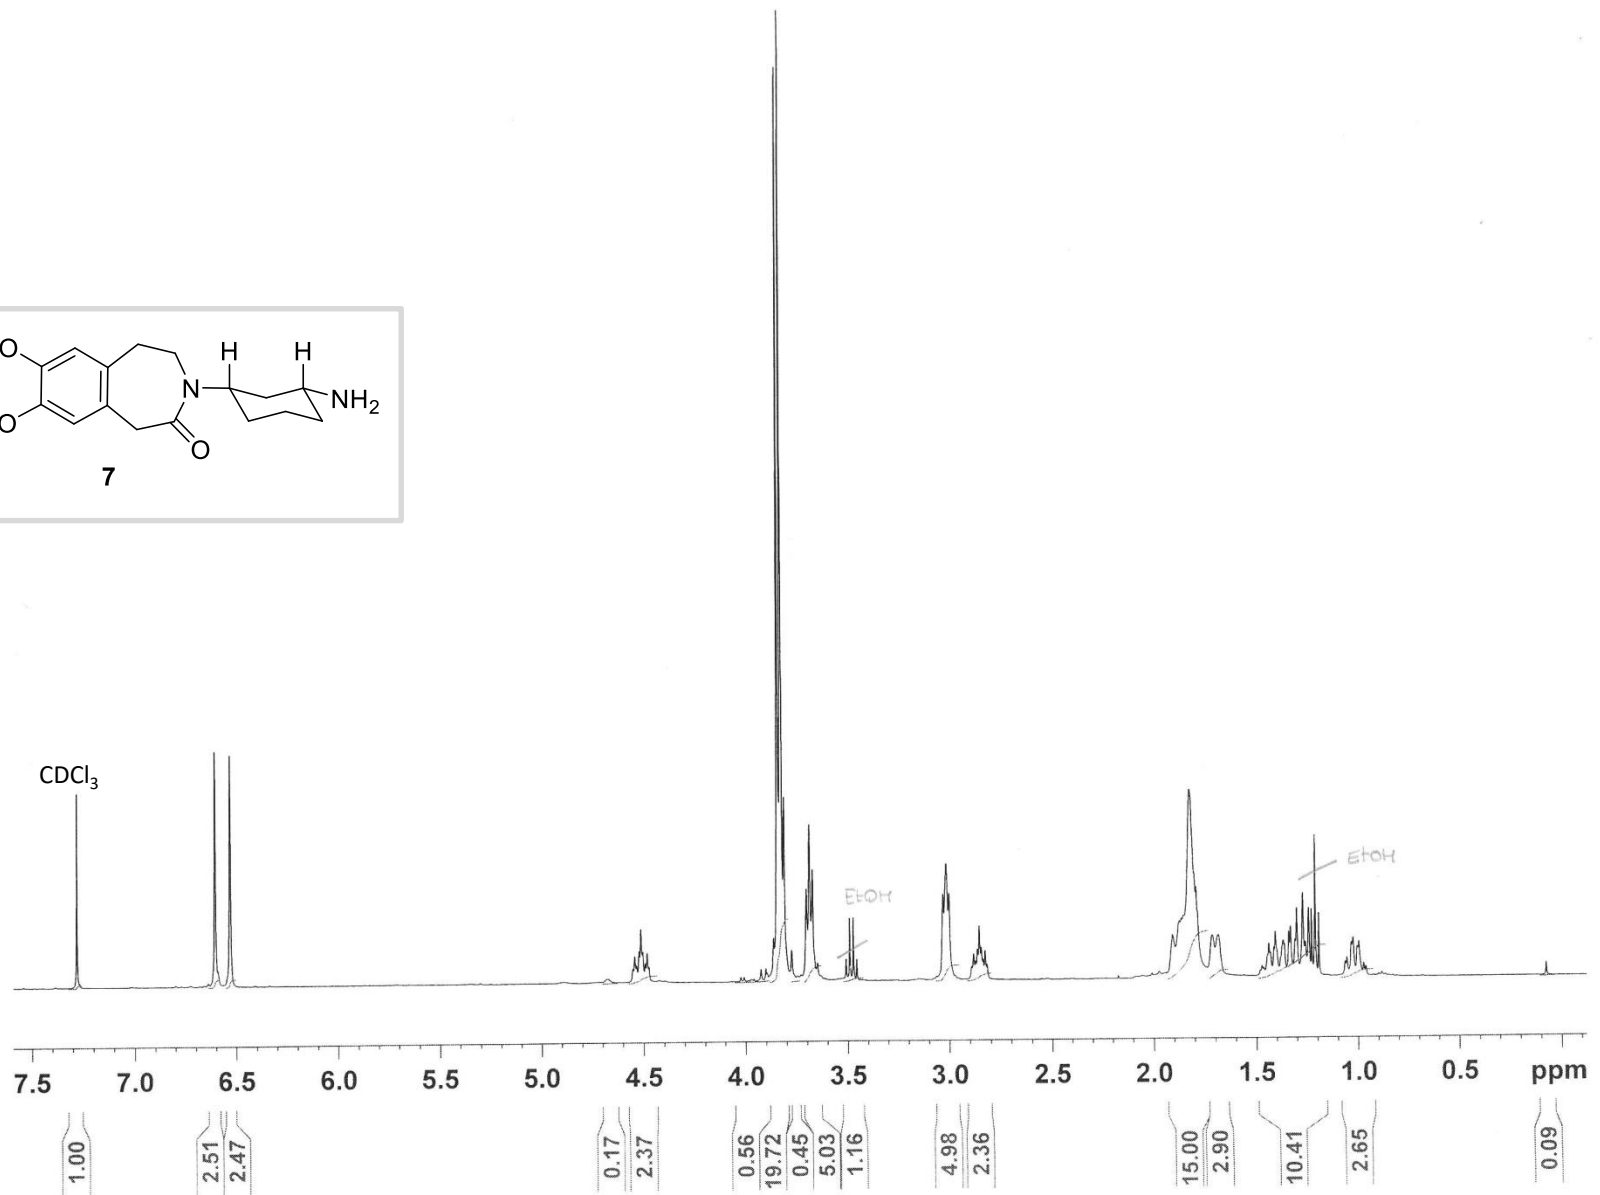

Figure S10:  $^{13}\text{C}$ -MMR of **7**( $\text{CDCl}_3$ )

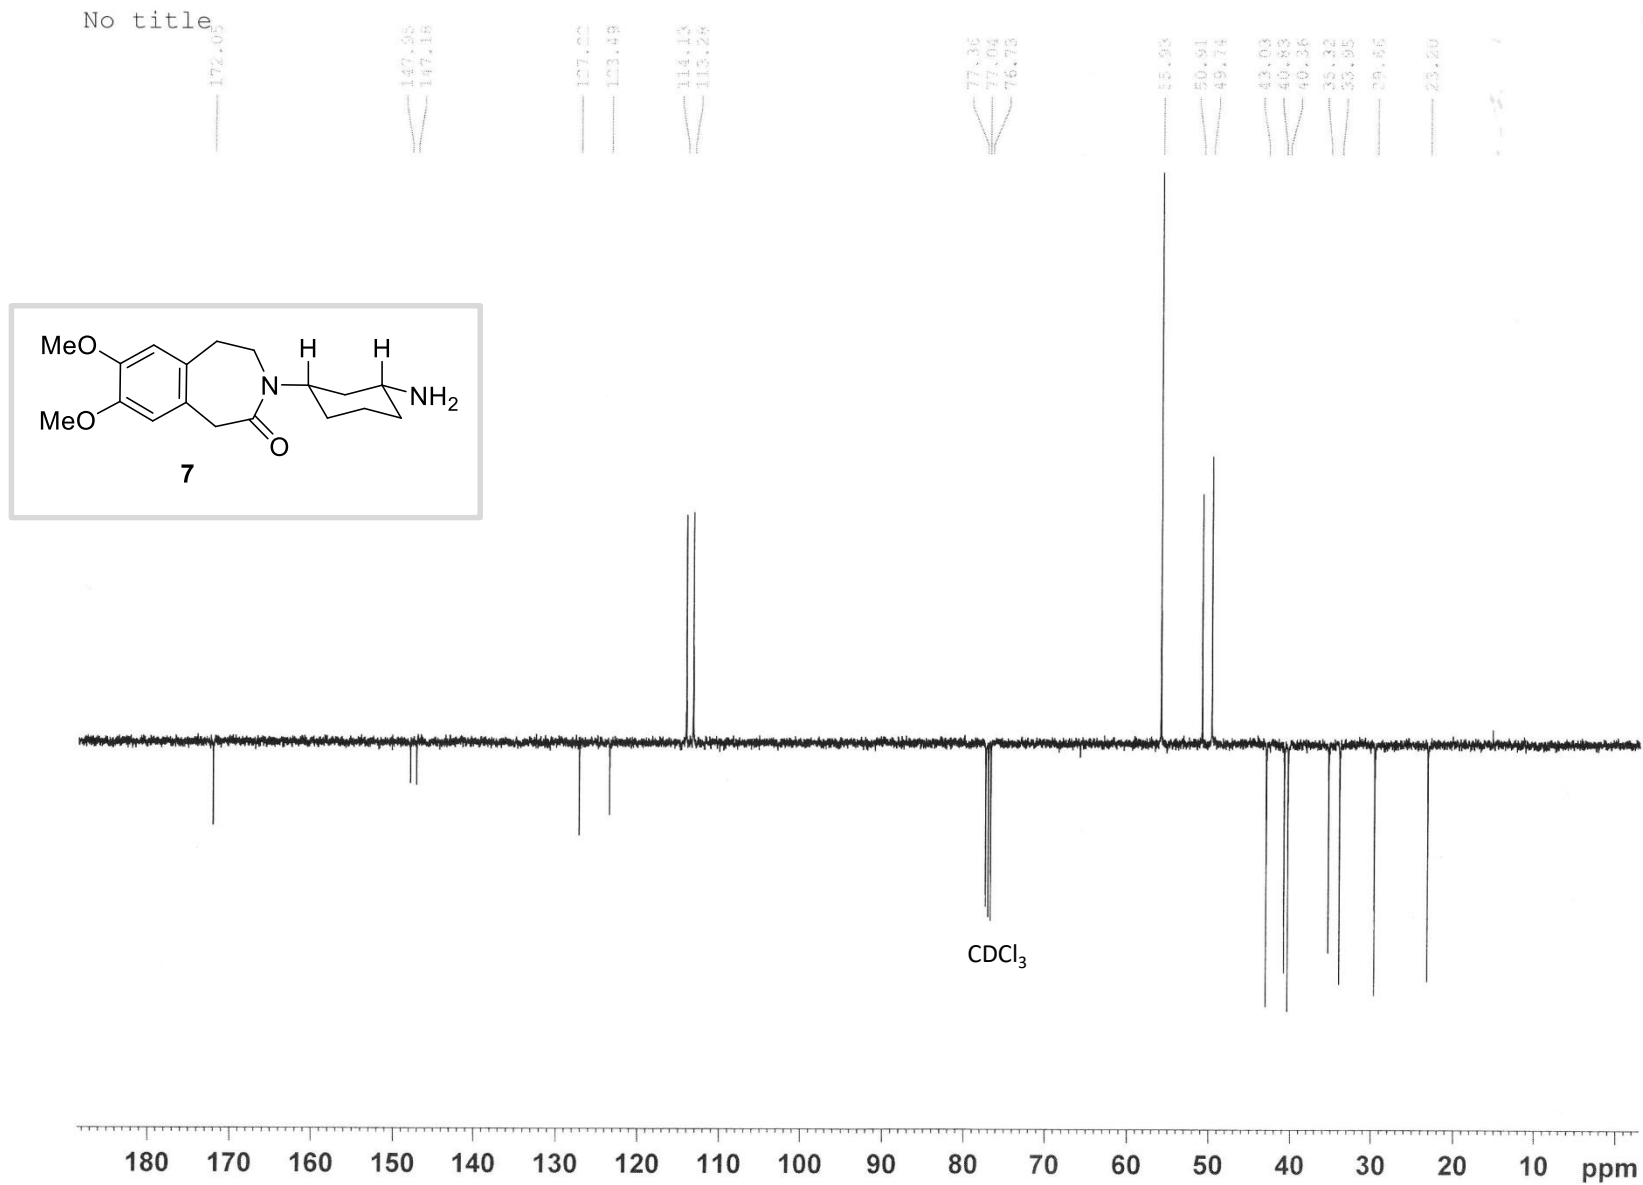



Figure S11:  $^1\text{H}$ -MMR of **7**( $\text{CDCl}_3$ )

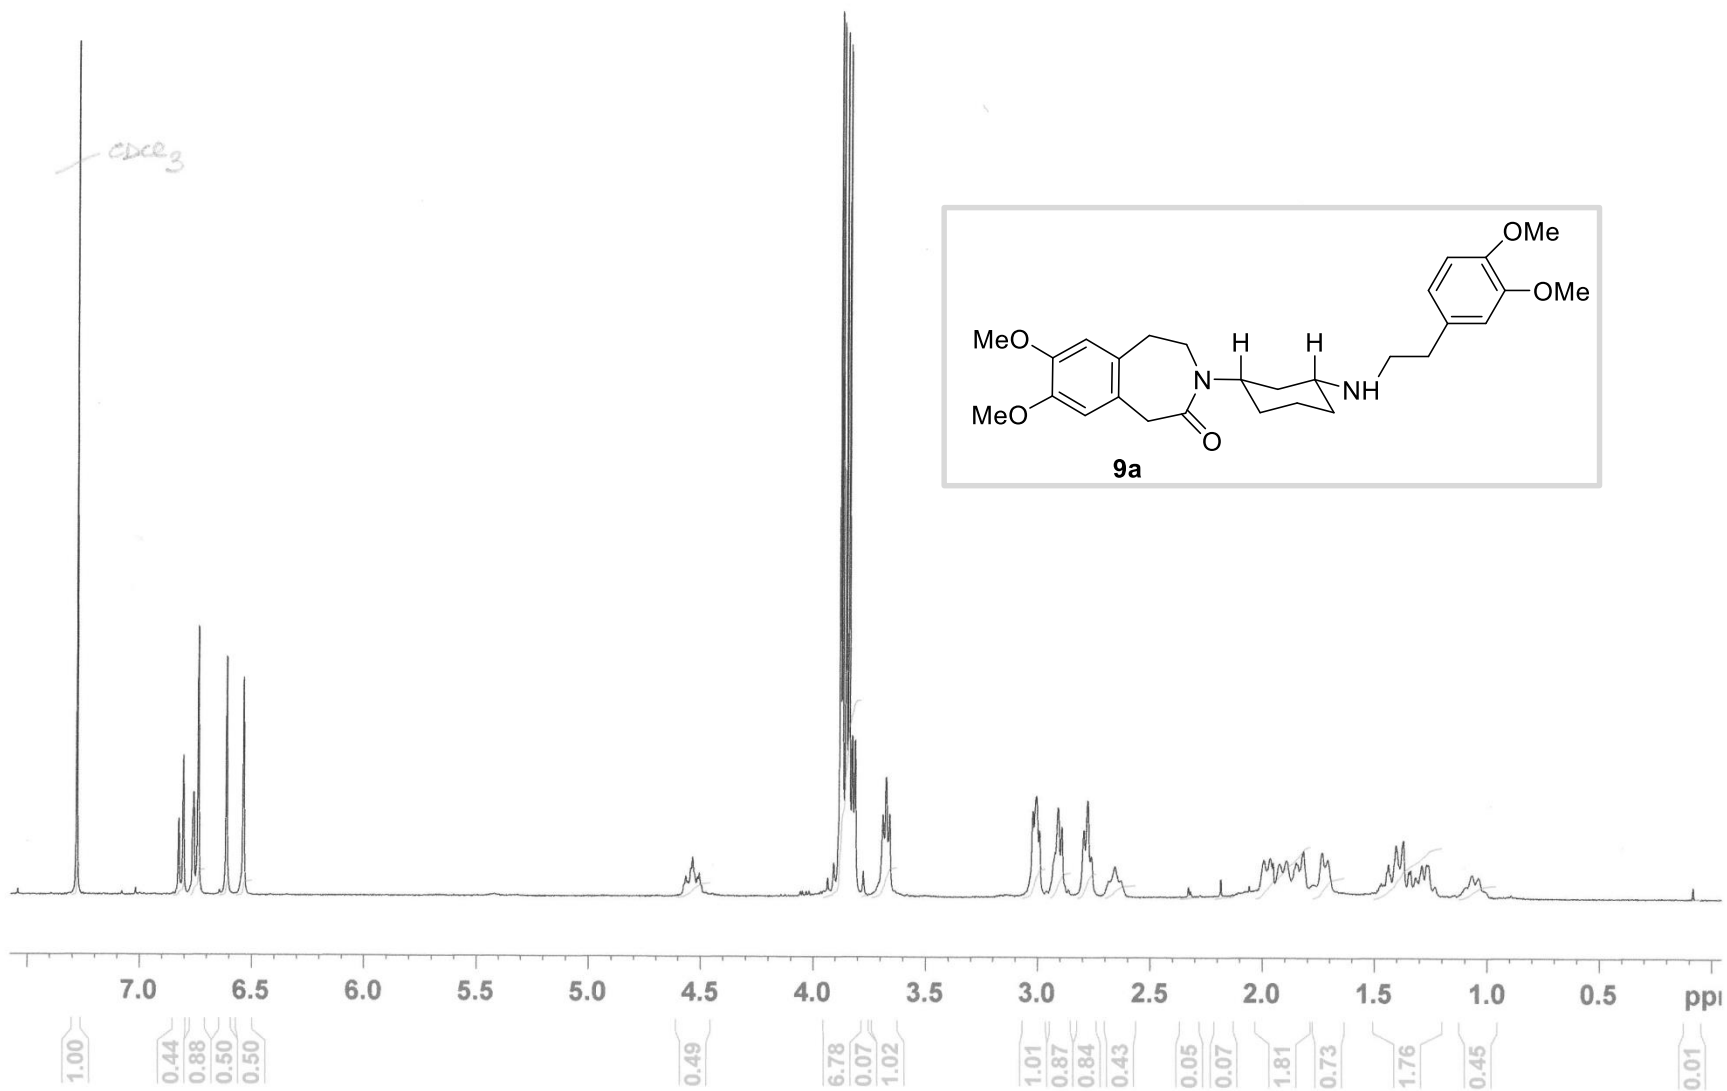

Figure S12:  $^{13}\text{C}$ -MMR of **7**( $\text{CDCl}_3$ )

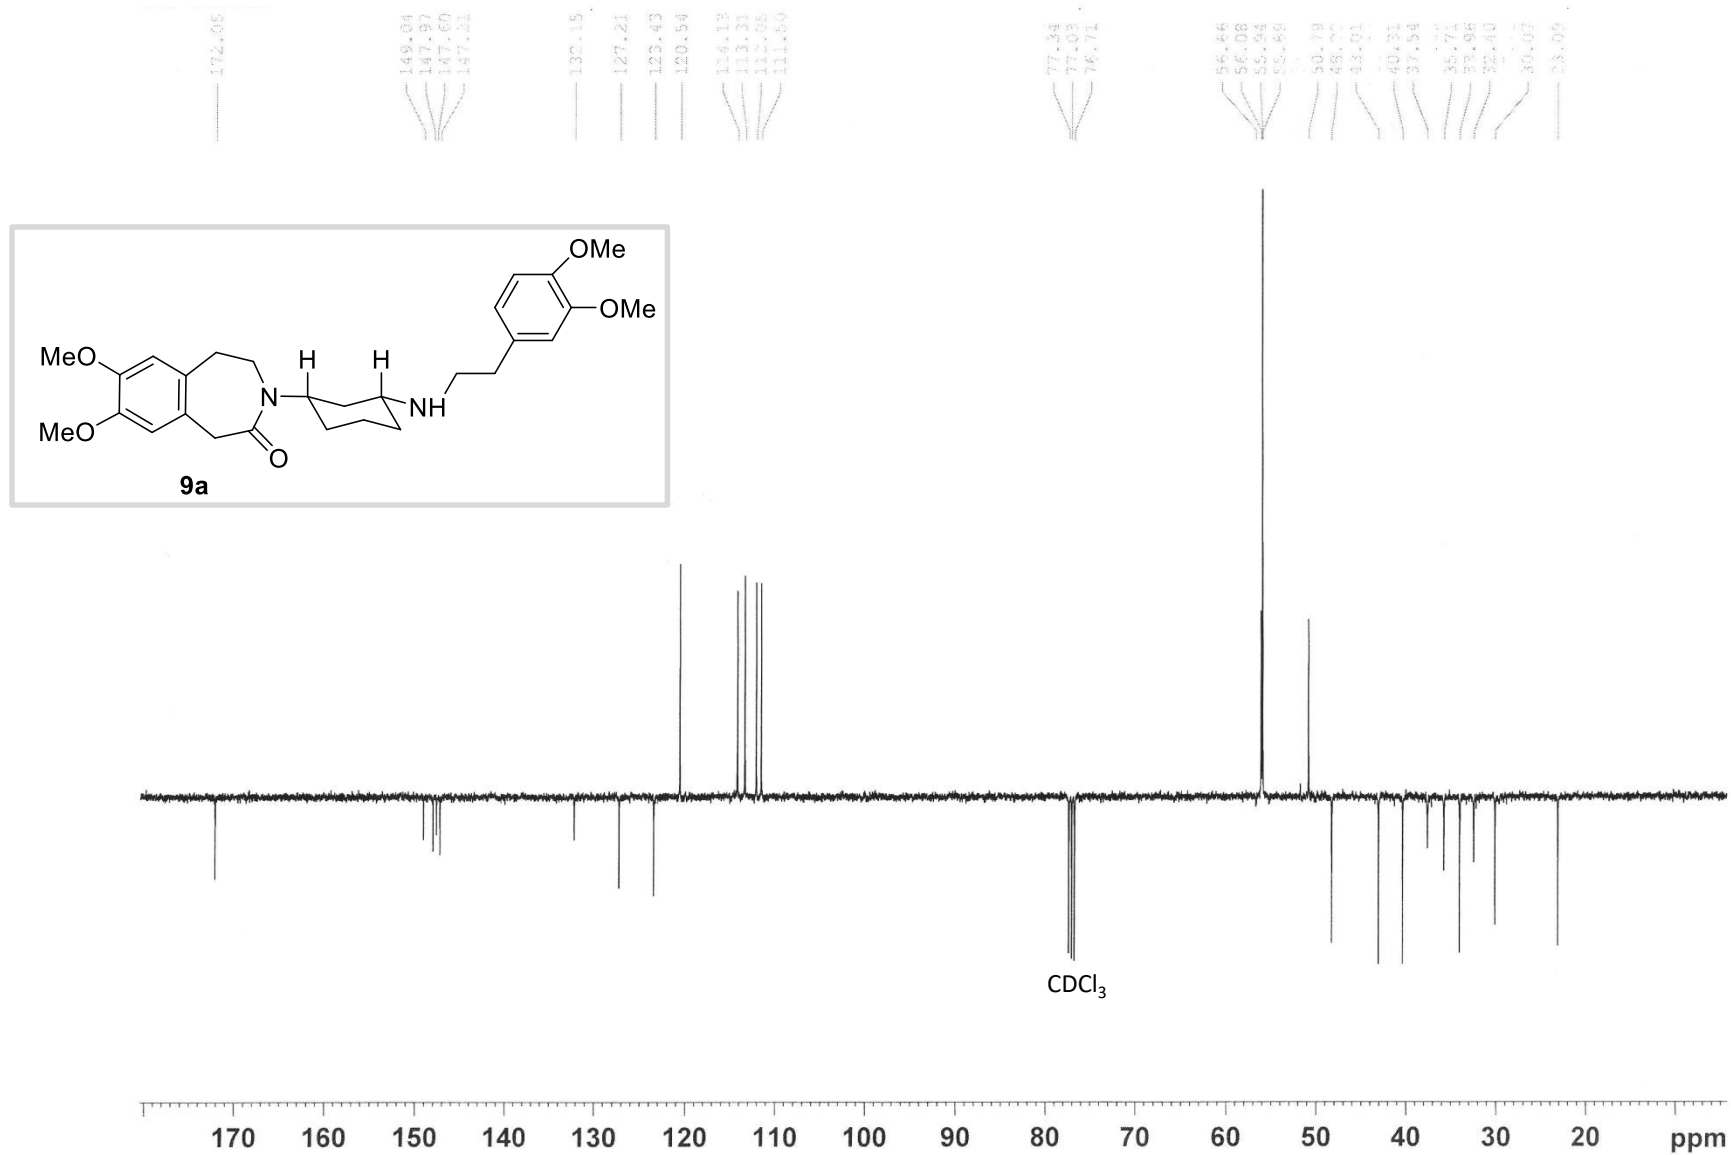

Figure S13:  $^1\text{H}$ -MMR of **3a**( $\text{CDCl}_3$ )

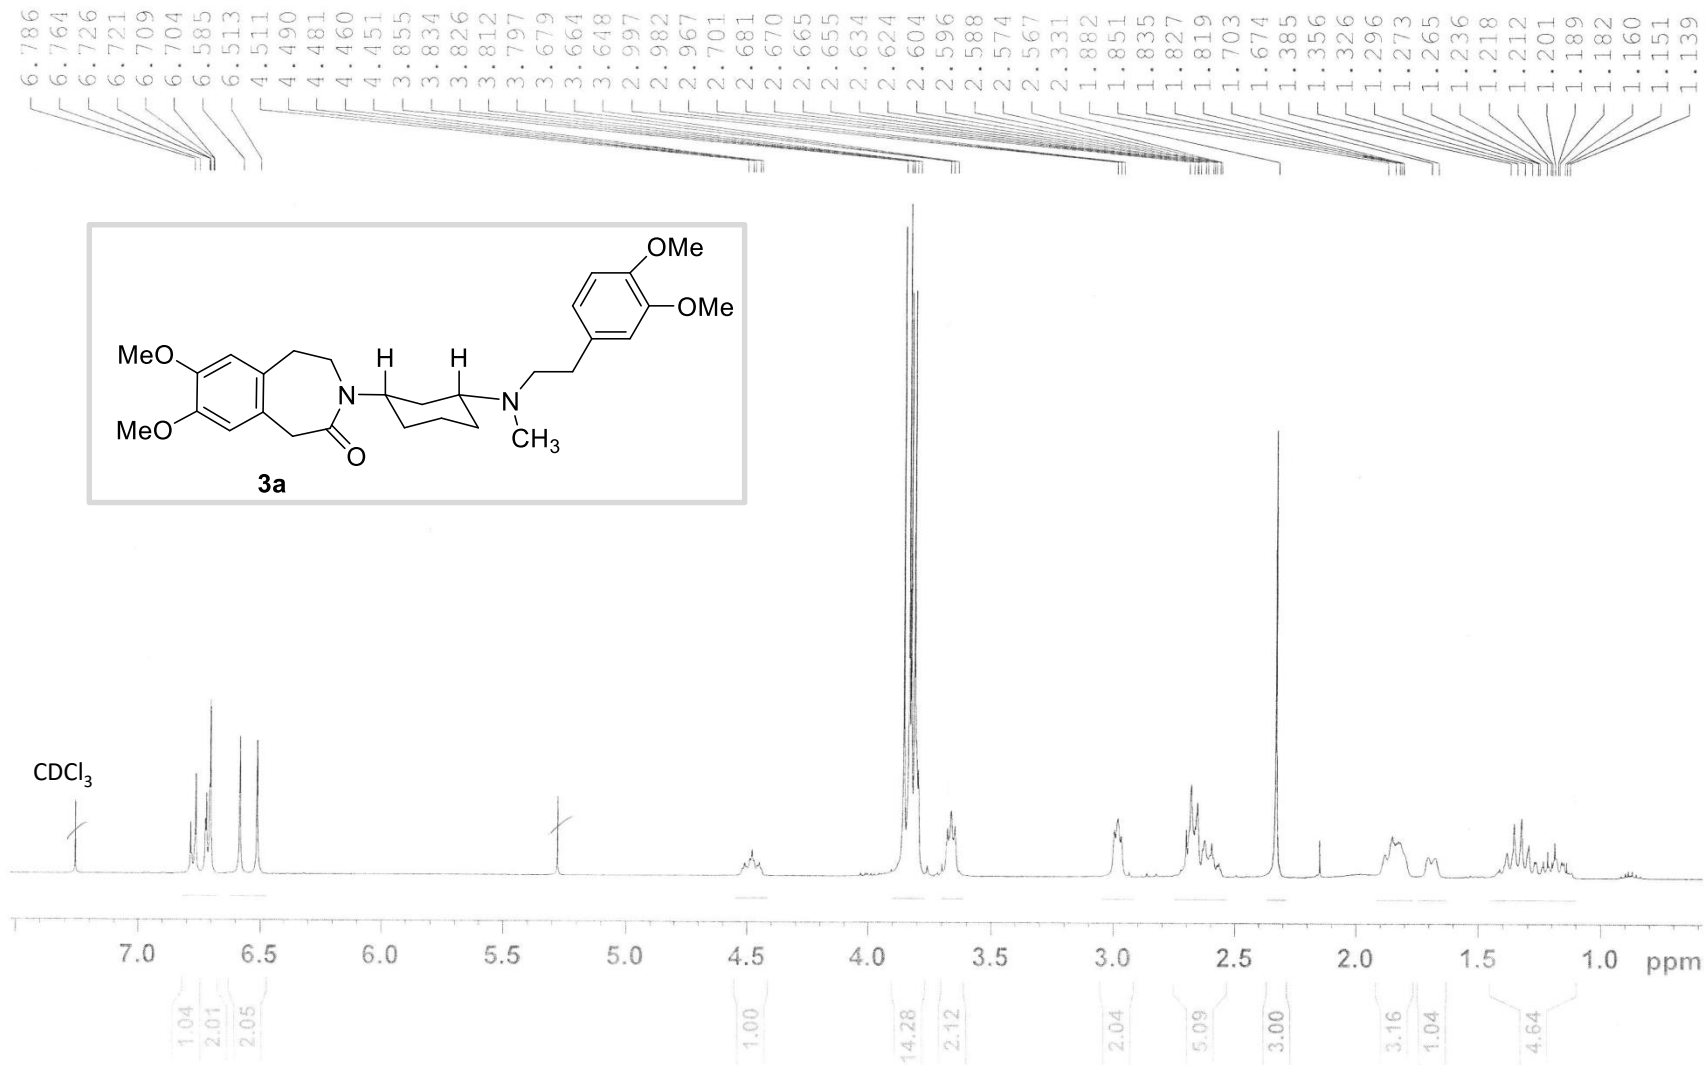

Figure S14:  $^{13}\text{C}$ -MMR of **3a**( $\text{CDCl}_3$ )

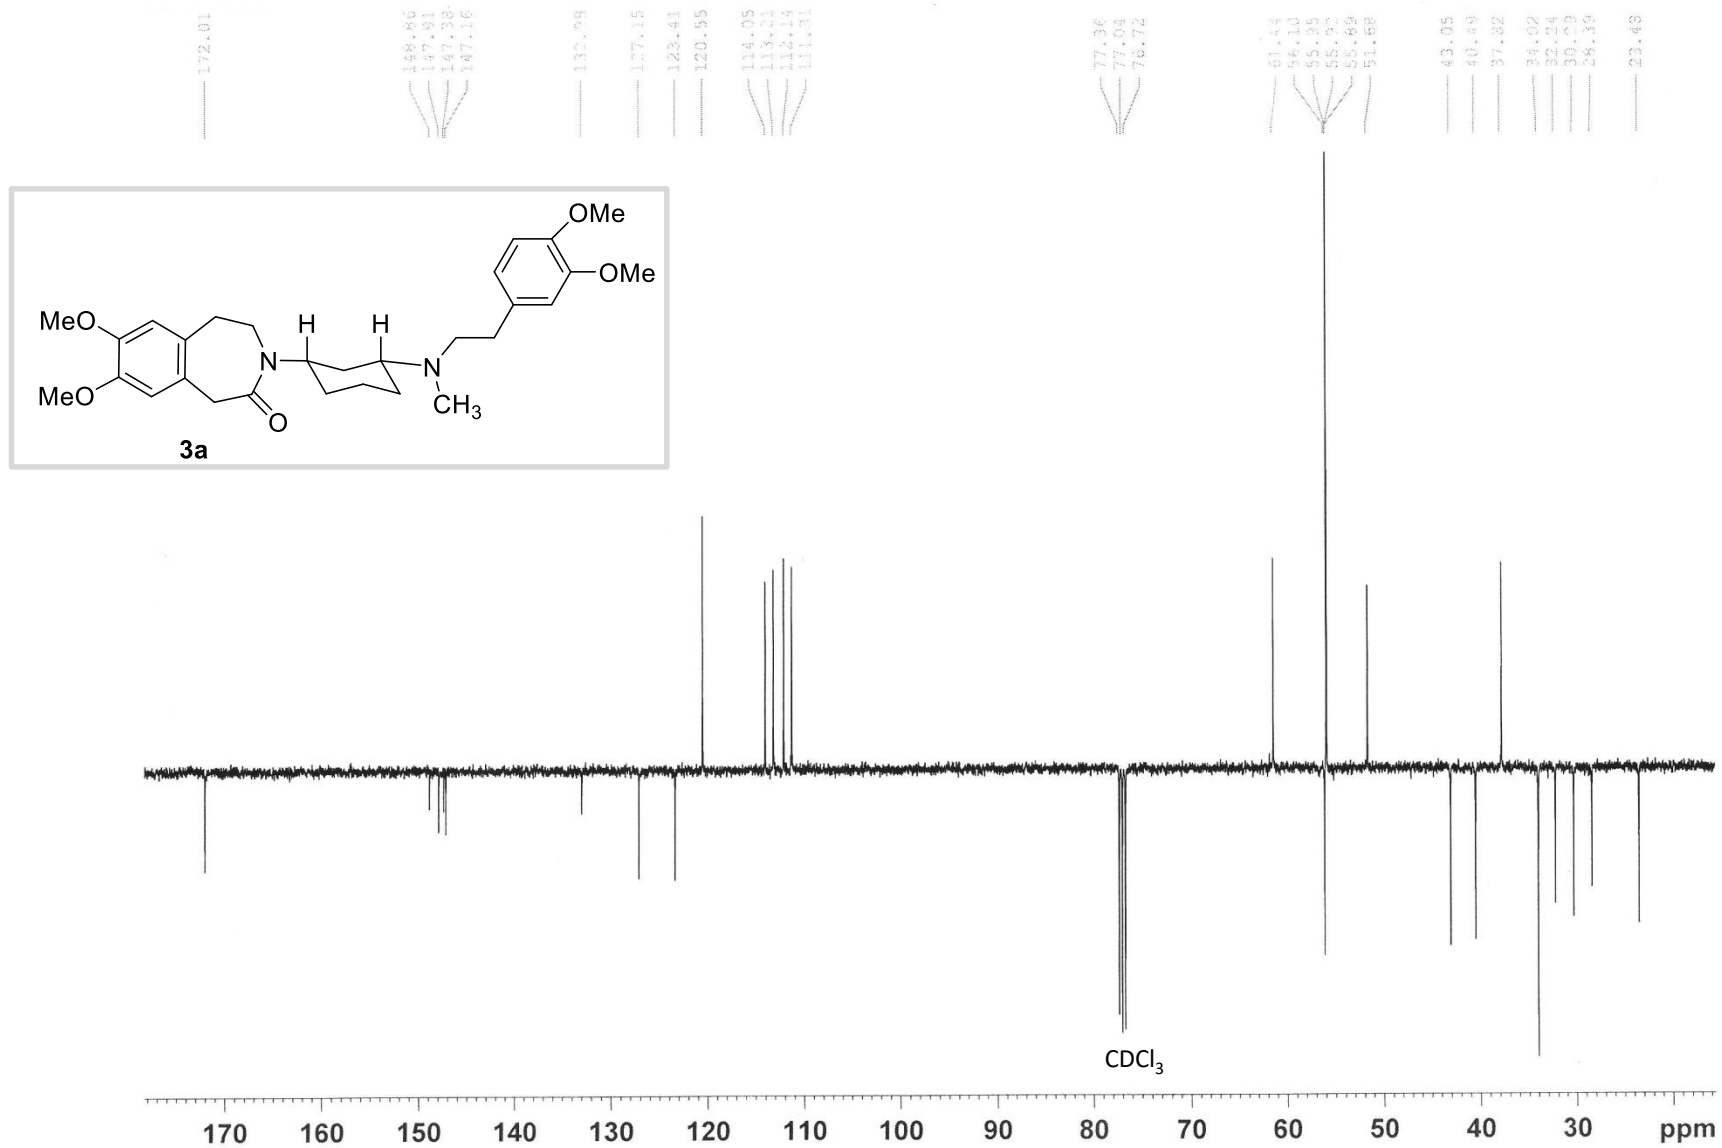

**Figure S15:**  $^1\text{H}$ -MMR of *cis* 5-(7,8-dimethoxy-2-oxo-1,2-dihydro-3H-benzo[d]azepin-3-yl)cyclohex-3-ene-1-carboxylic acid ( $\text{CDCl}_3$ )

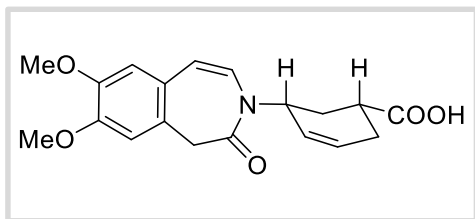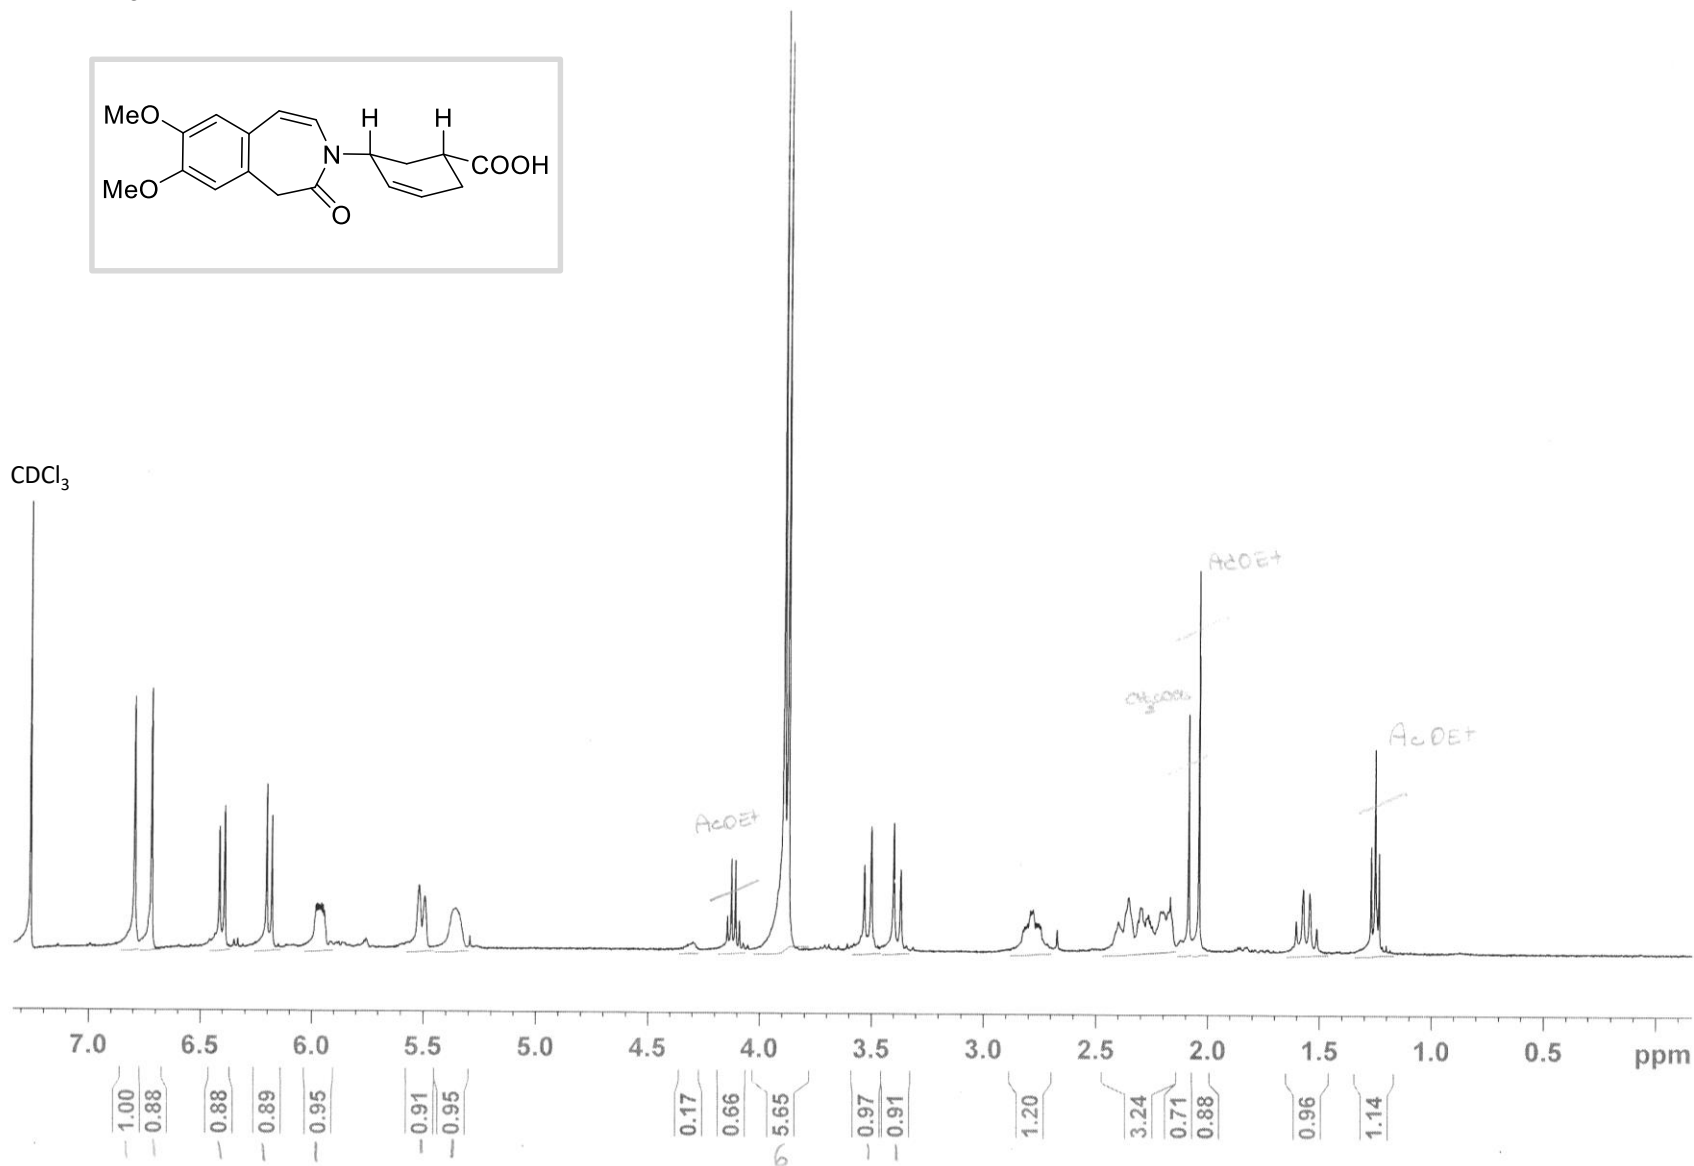

**Figure S16:**  $^1\text{H}$ -MMR of *cis* 3-(5-aminocyclohex-2-en-1-yl)-7,8-dimethoxy-2,3-dihydro-1H-3-benzazepin-2-one ( $\text{CDCl}_3$ )

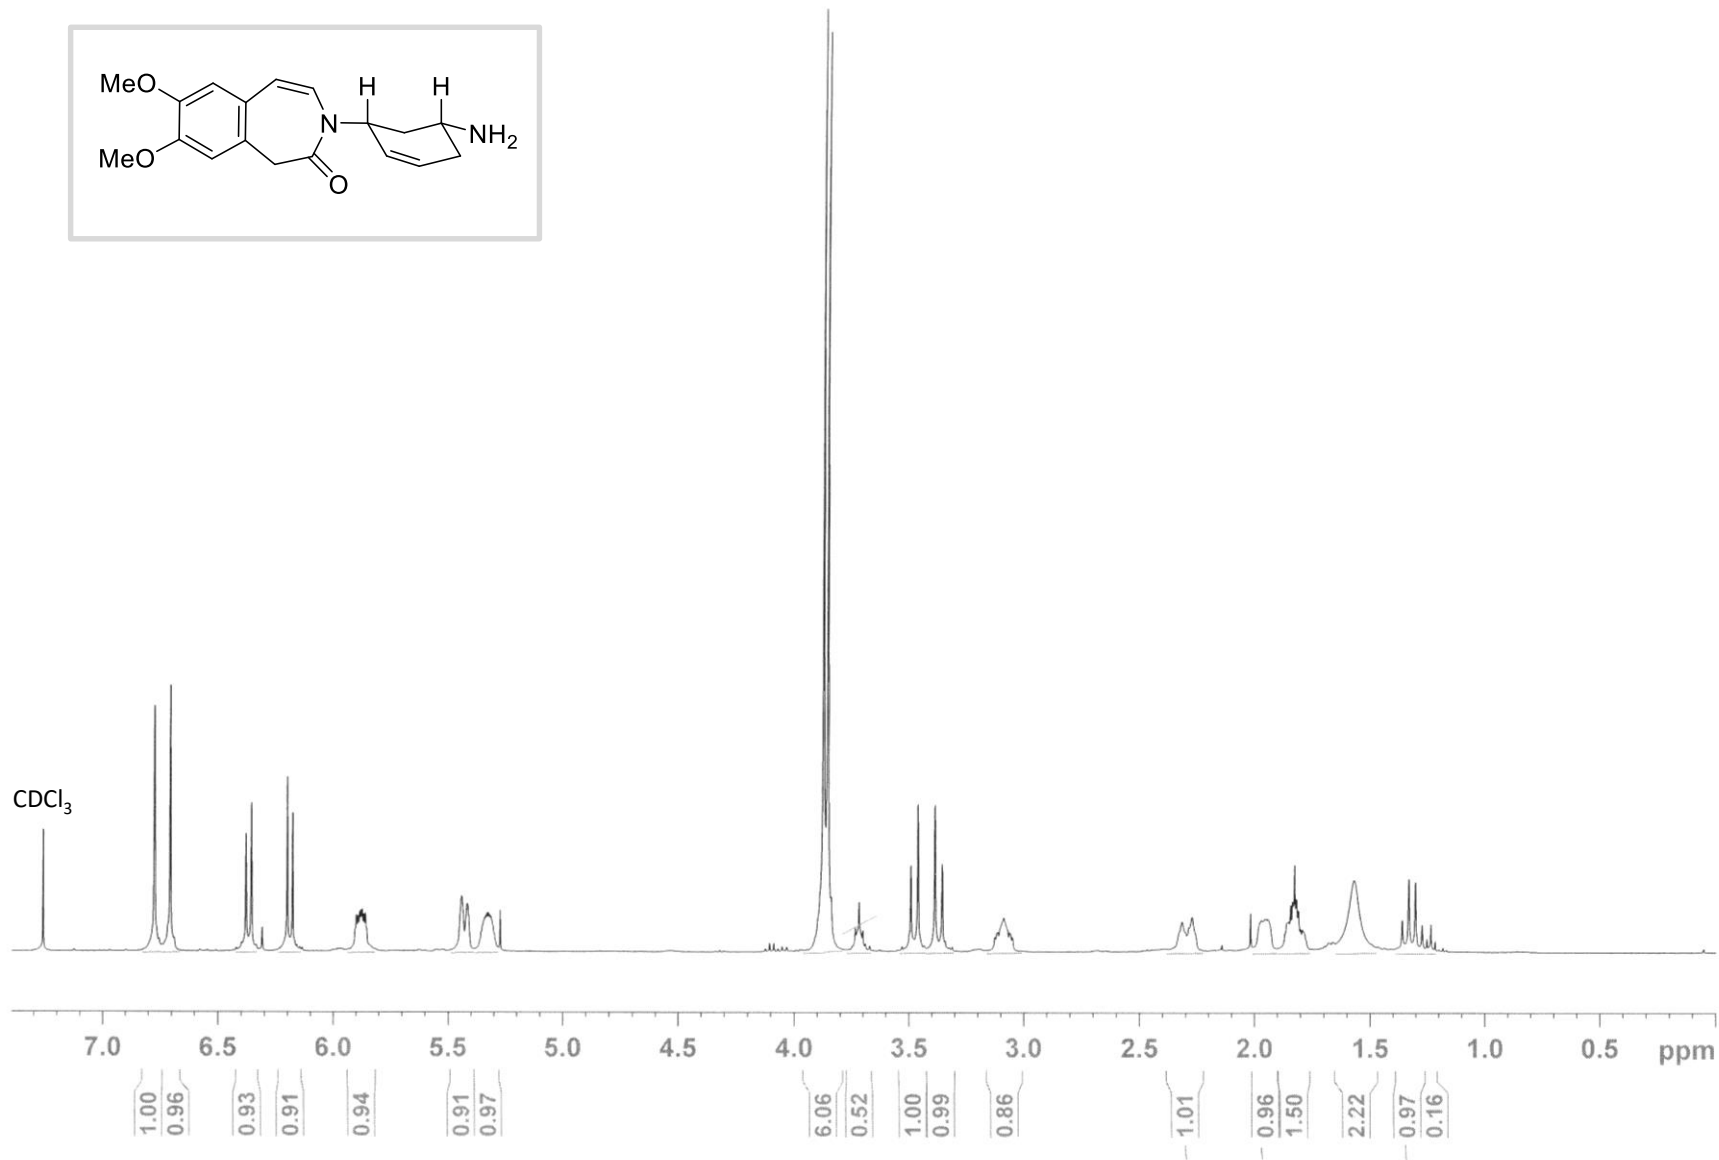

**Figure S17:**  $^1\text{H}$ -MMR of *cis* 3-(5-{{2-(3,4-dimethoxyphenyl)ethyl}amino}cyclohex-2-en-1-yl)-7,8-dimethoxy-2,3-dihydro-1H-3-benzazepin-2-one ( $\text{CDCl}_3$ )

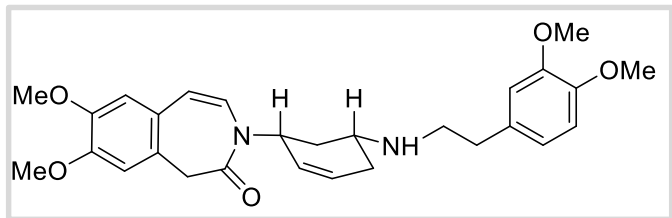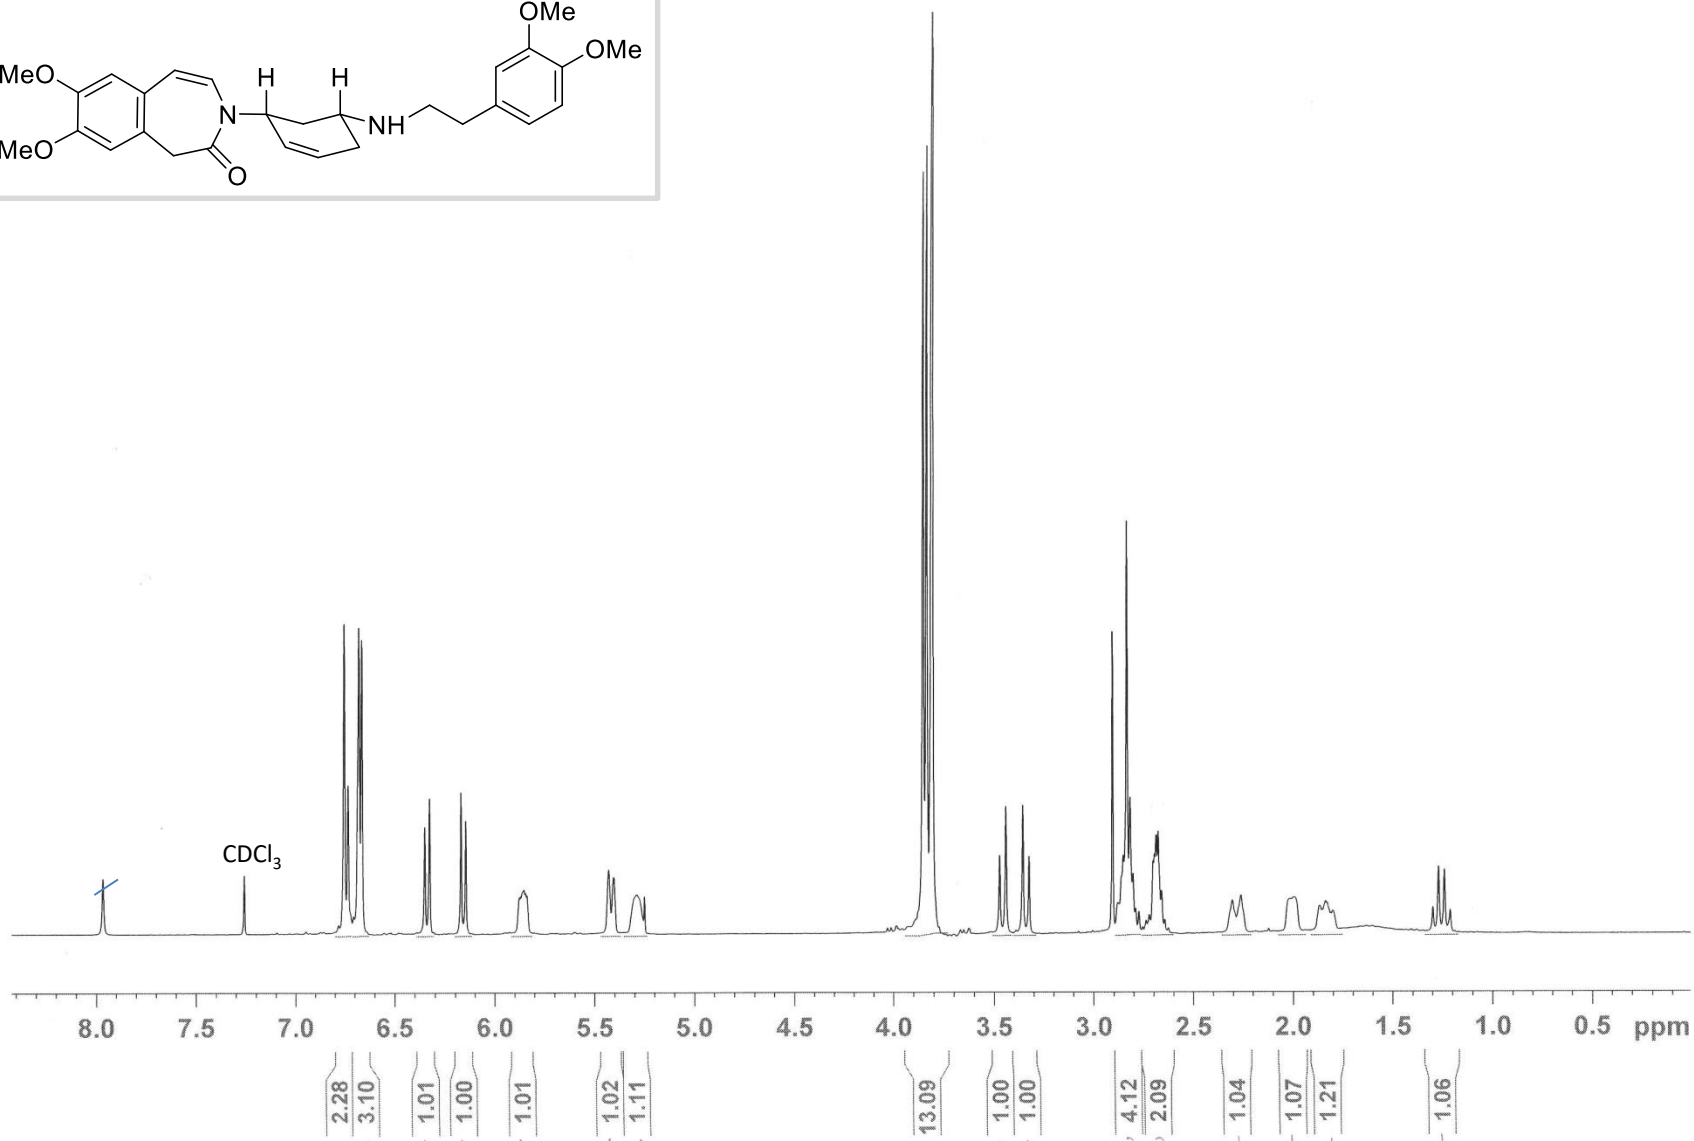

Figure S18:  $^1\text{H}$ -MMR of *cis* **3g** ( $\text{CDCl}_3$ )

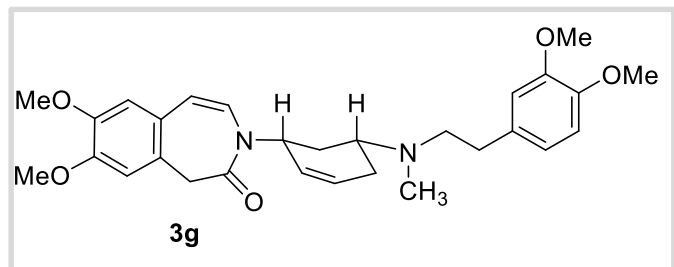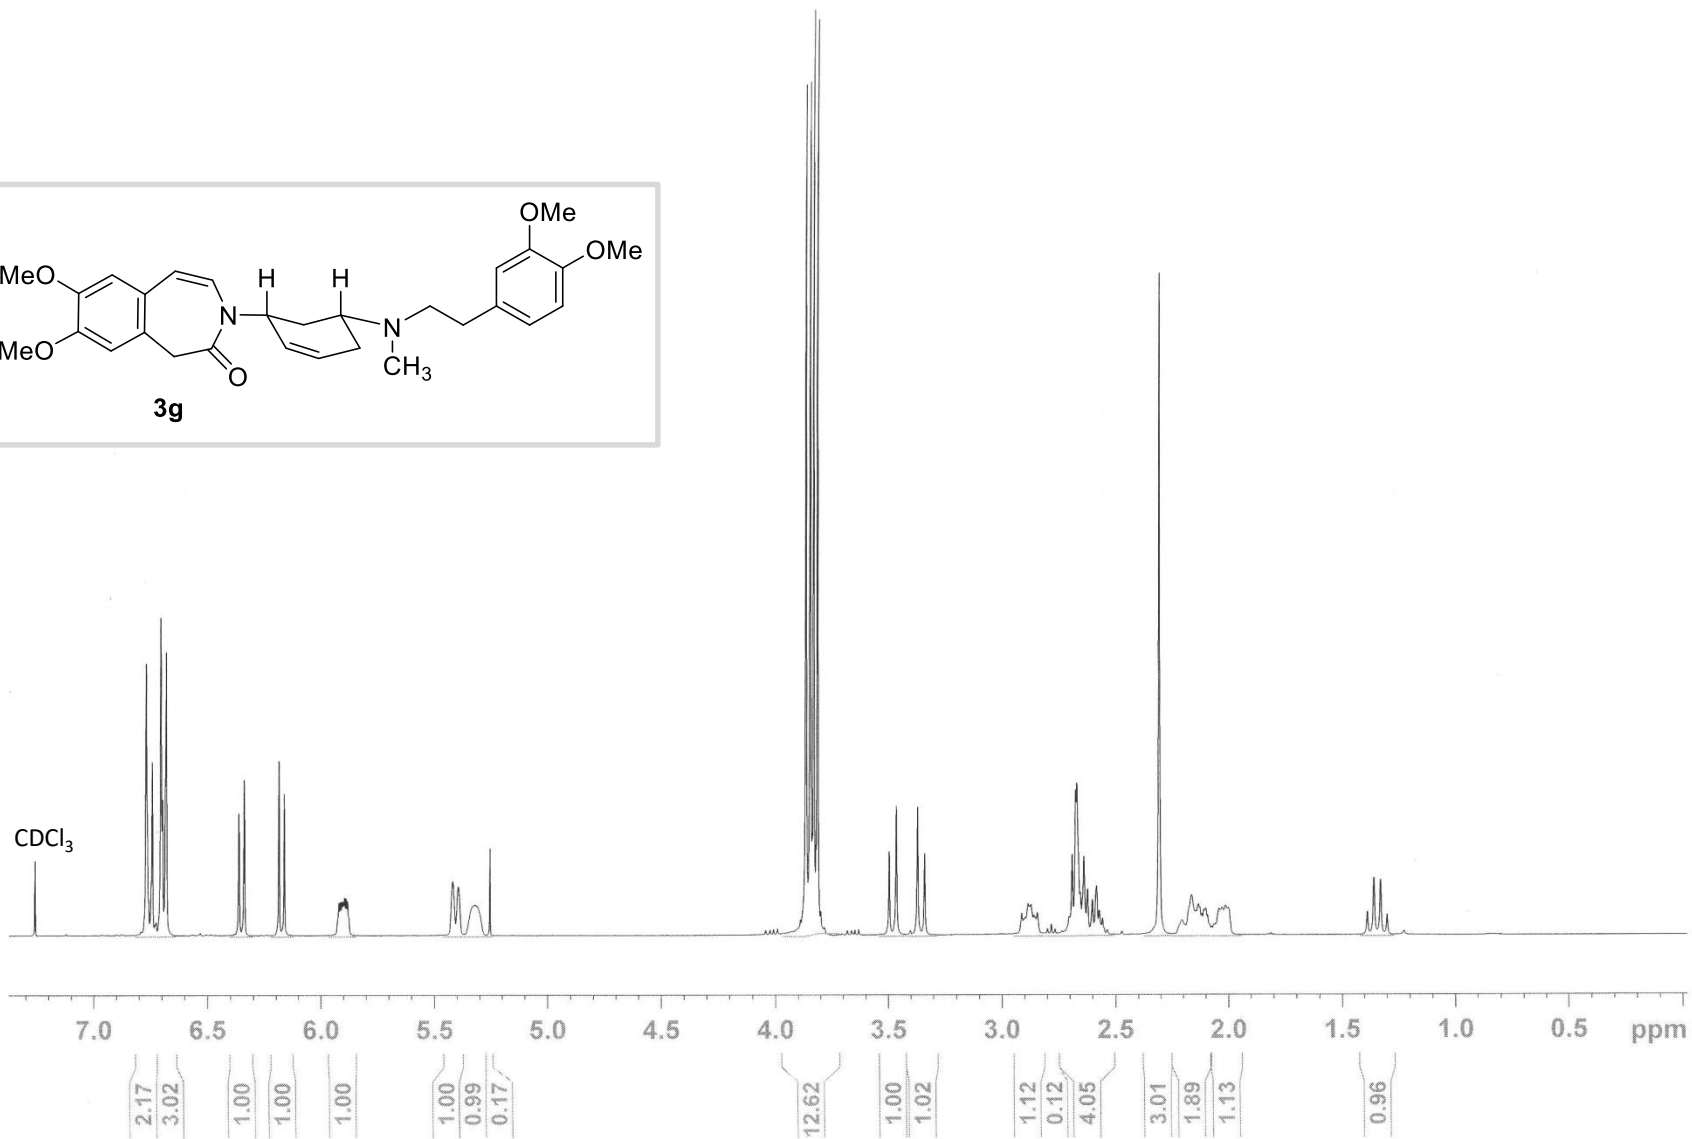



**Figure S19.** LC-DAD analysis of **3a**

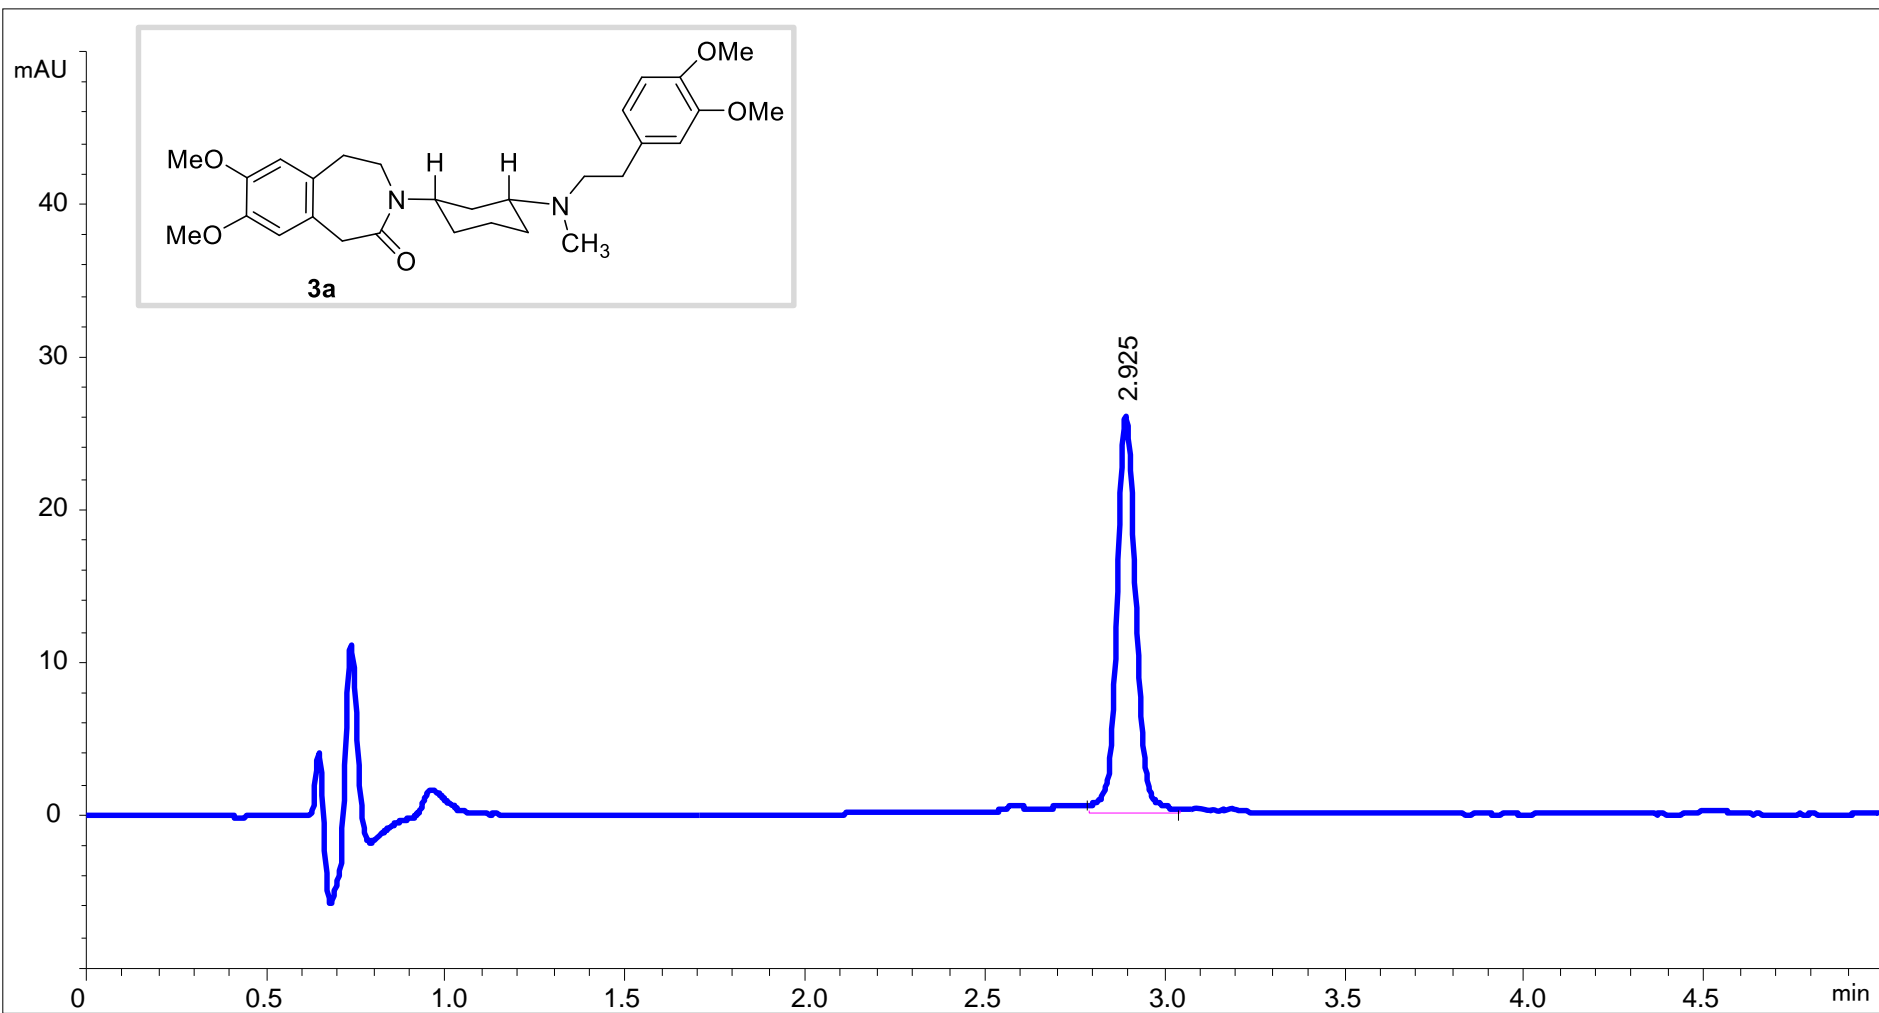

**Figure S20.** LC-DAD analysis of **3b**

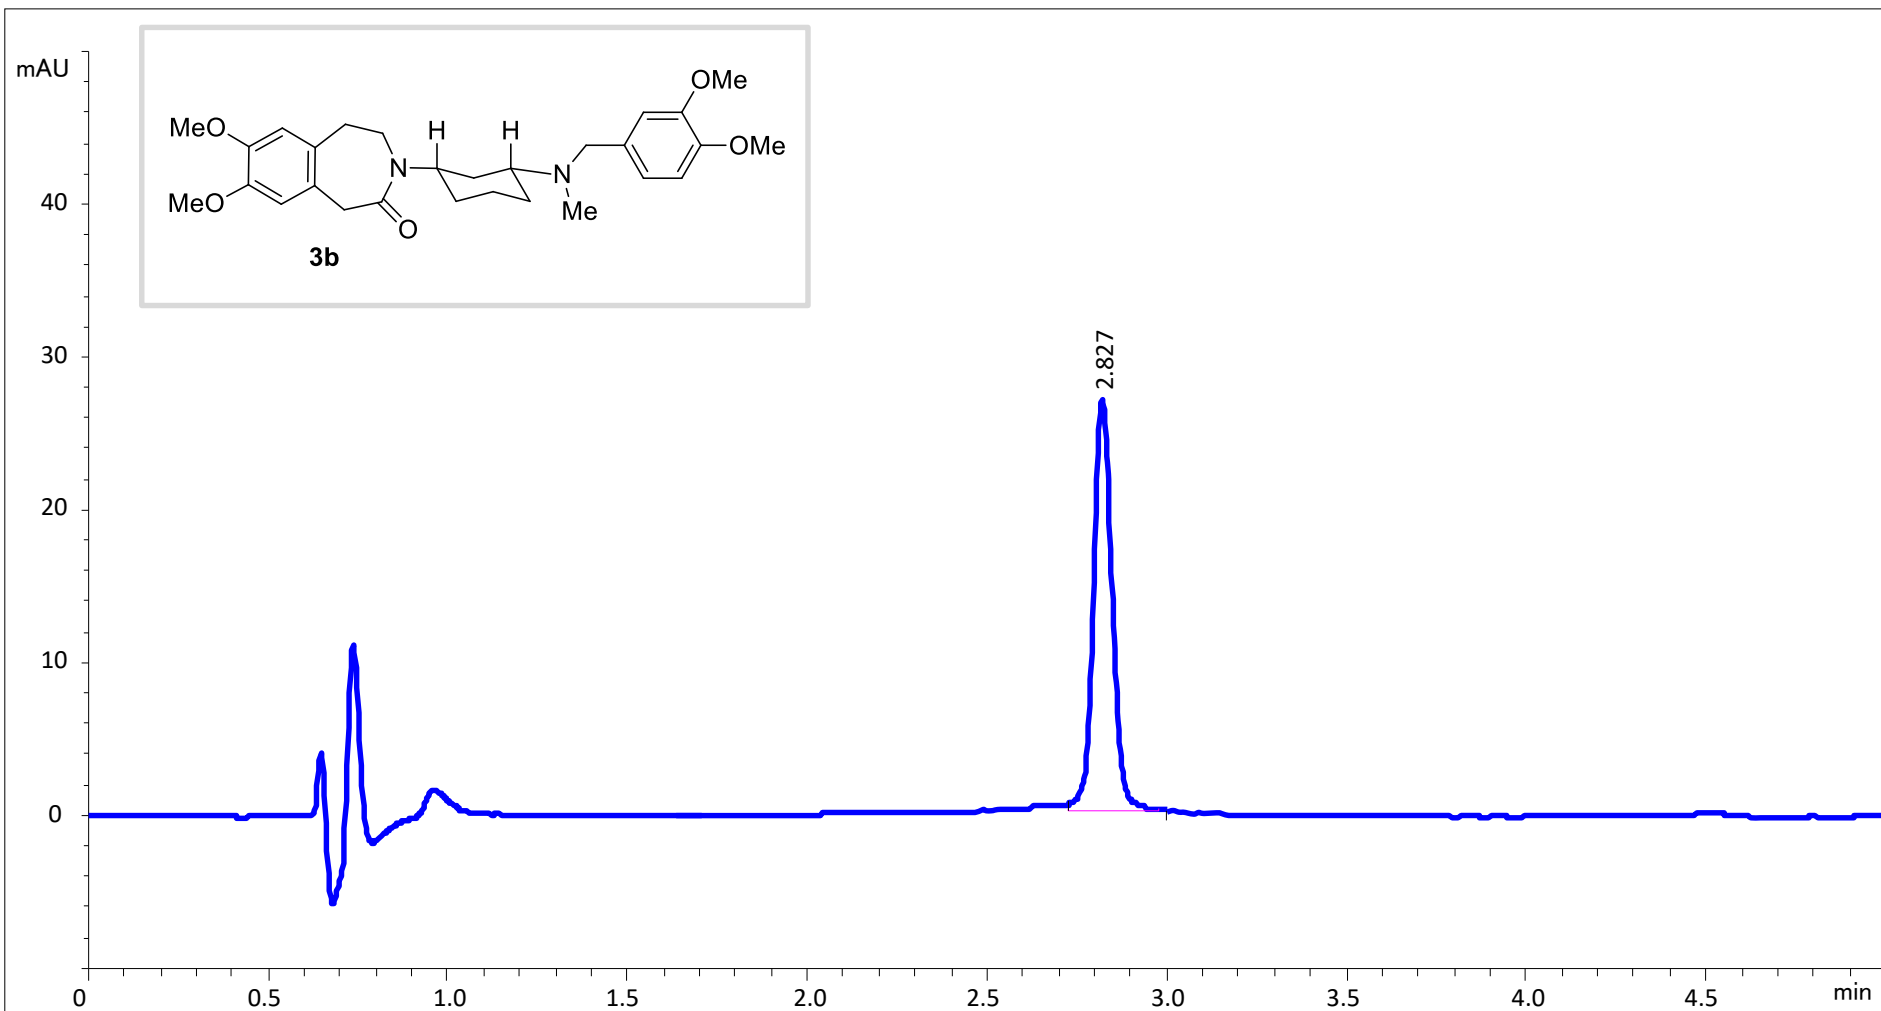

**Figure S21.** LC-DAD analysis of **3c**

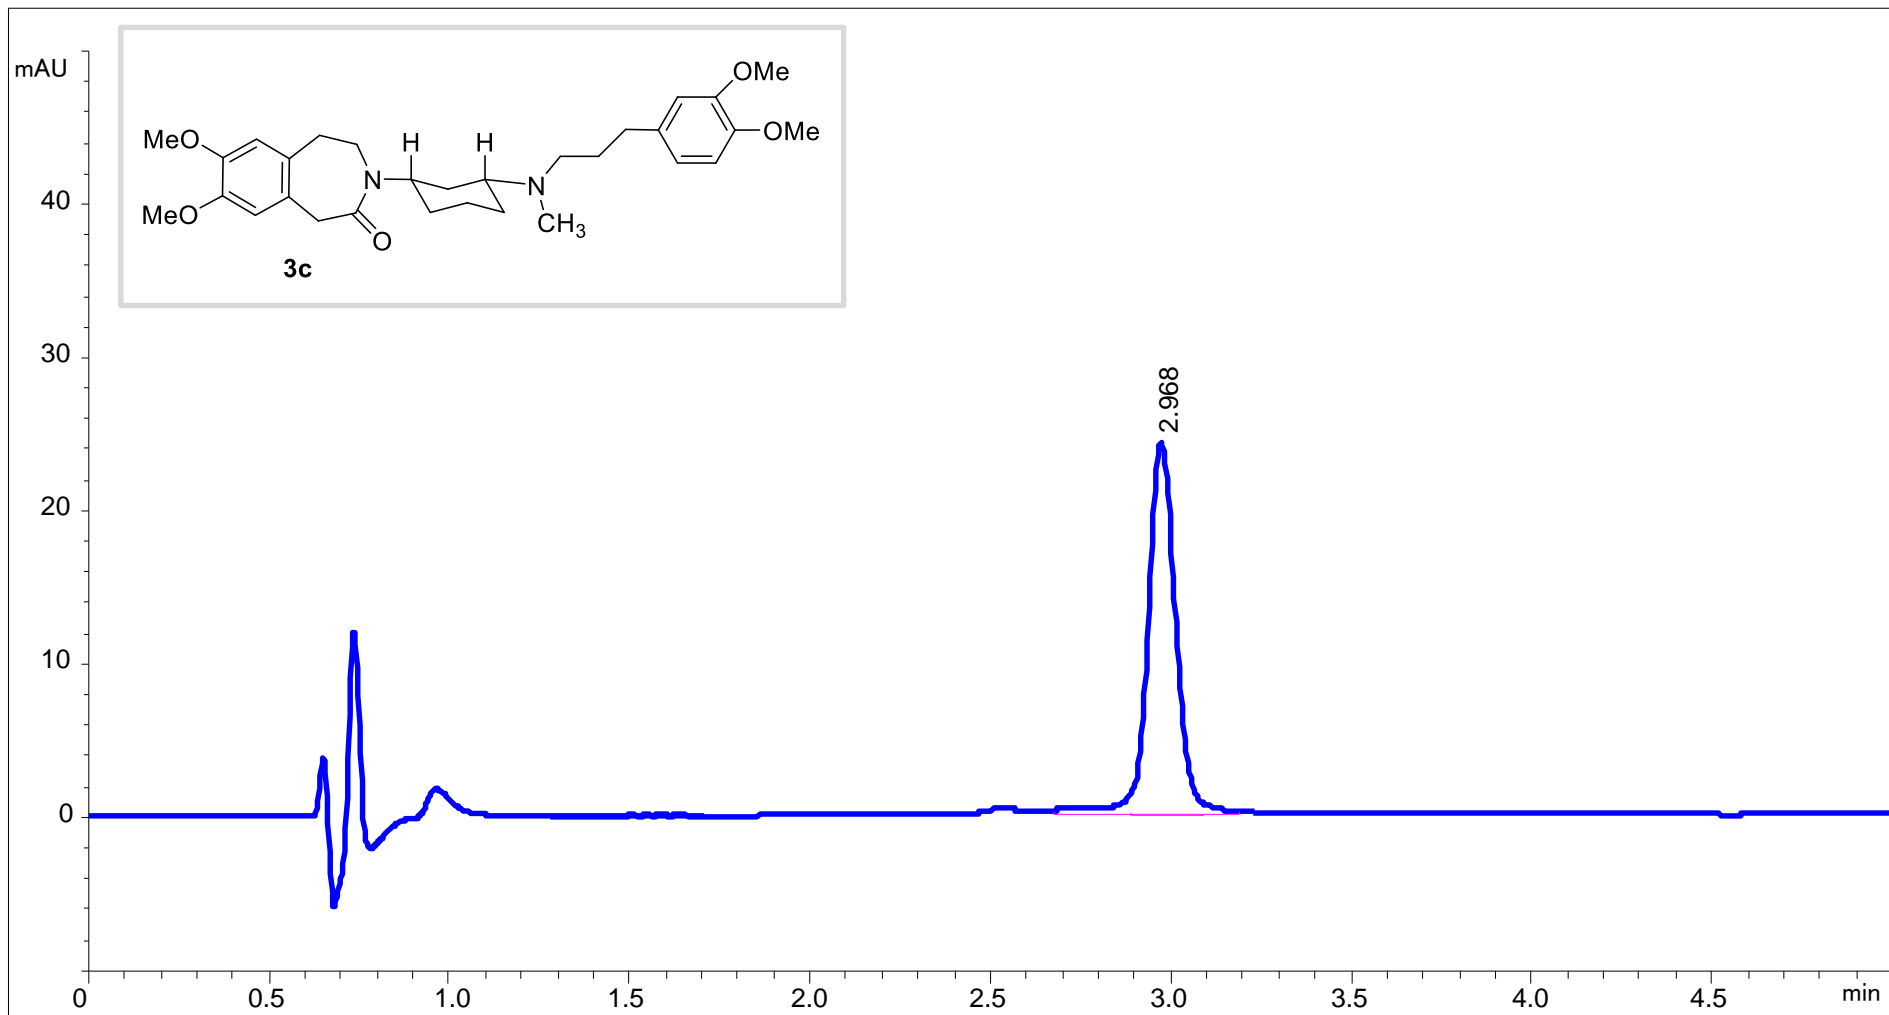

**Figure S22.** LC-DAD analysis of **3d**

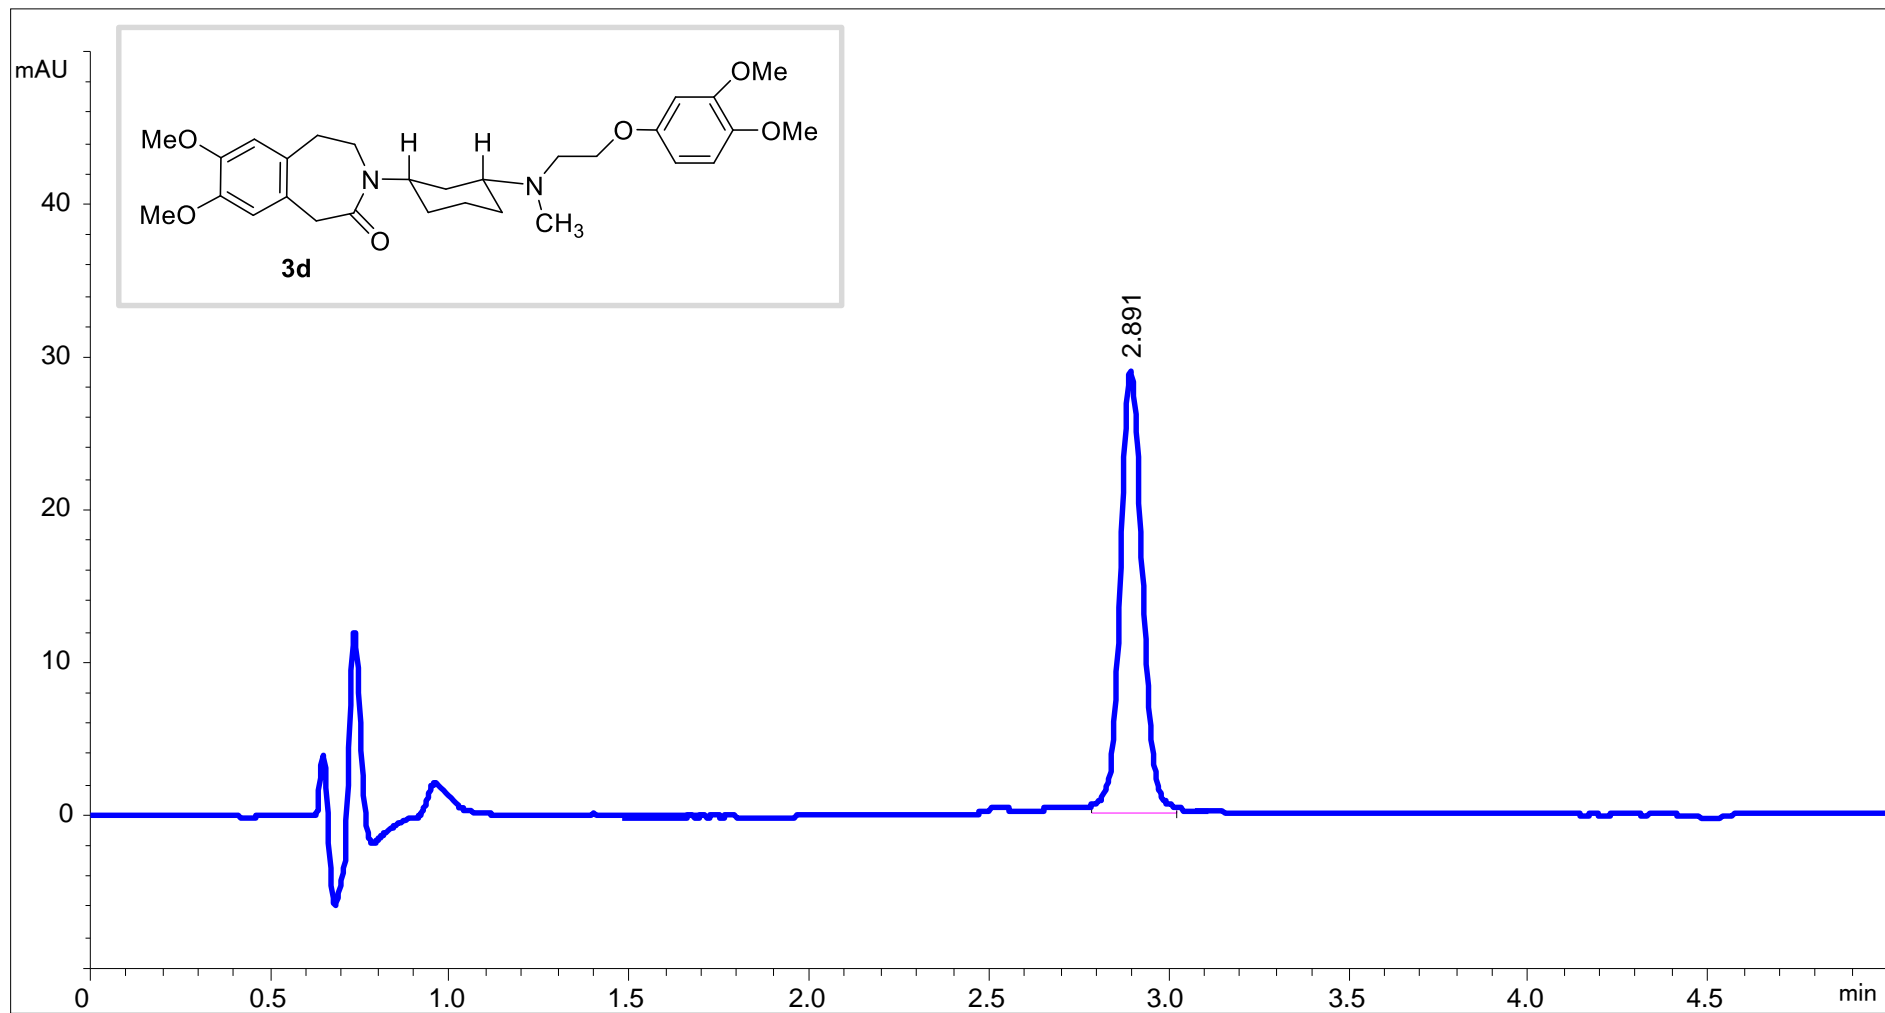

**Figure S23.** LC-DAD analysis of **3e**

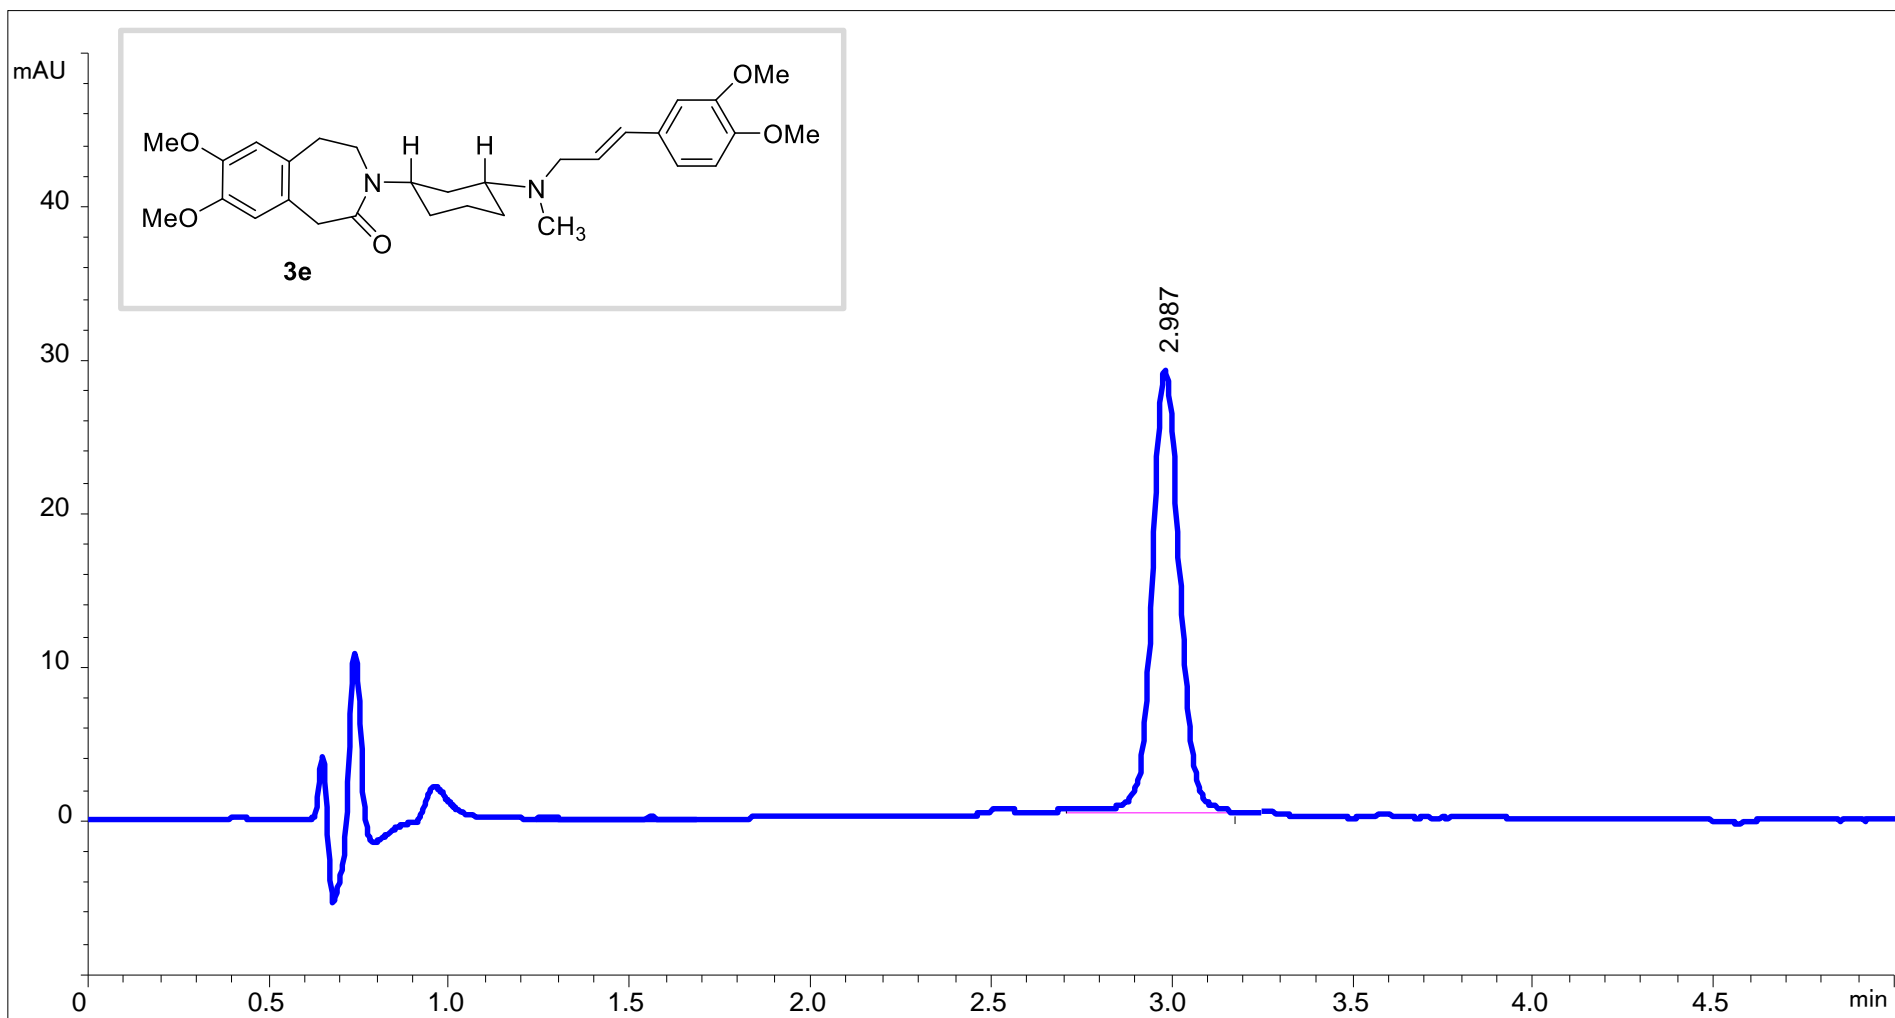

**Figure S24.** LC-DAD analysis of **3f**

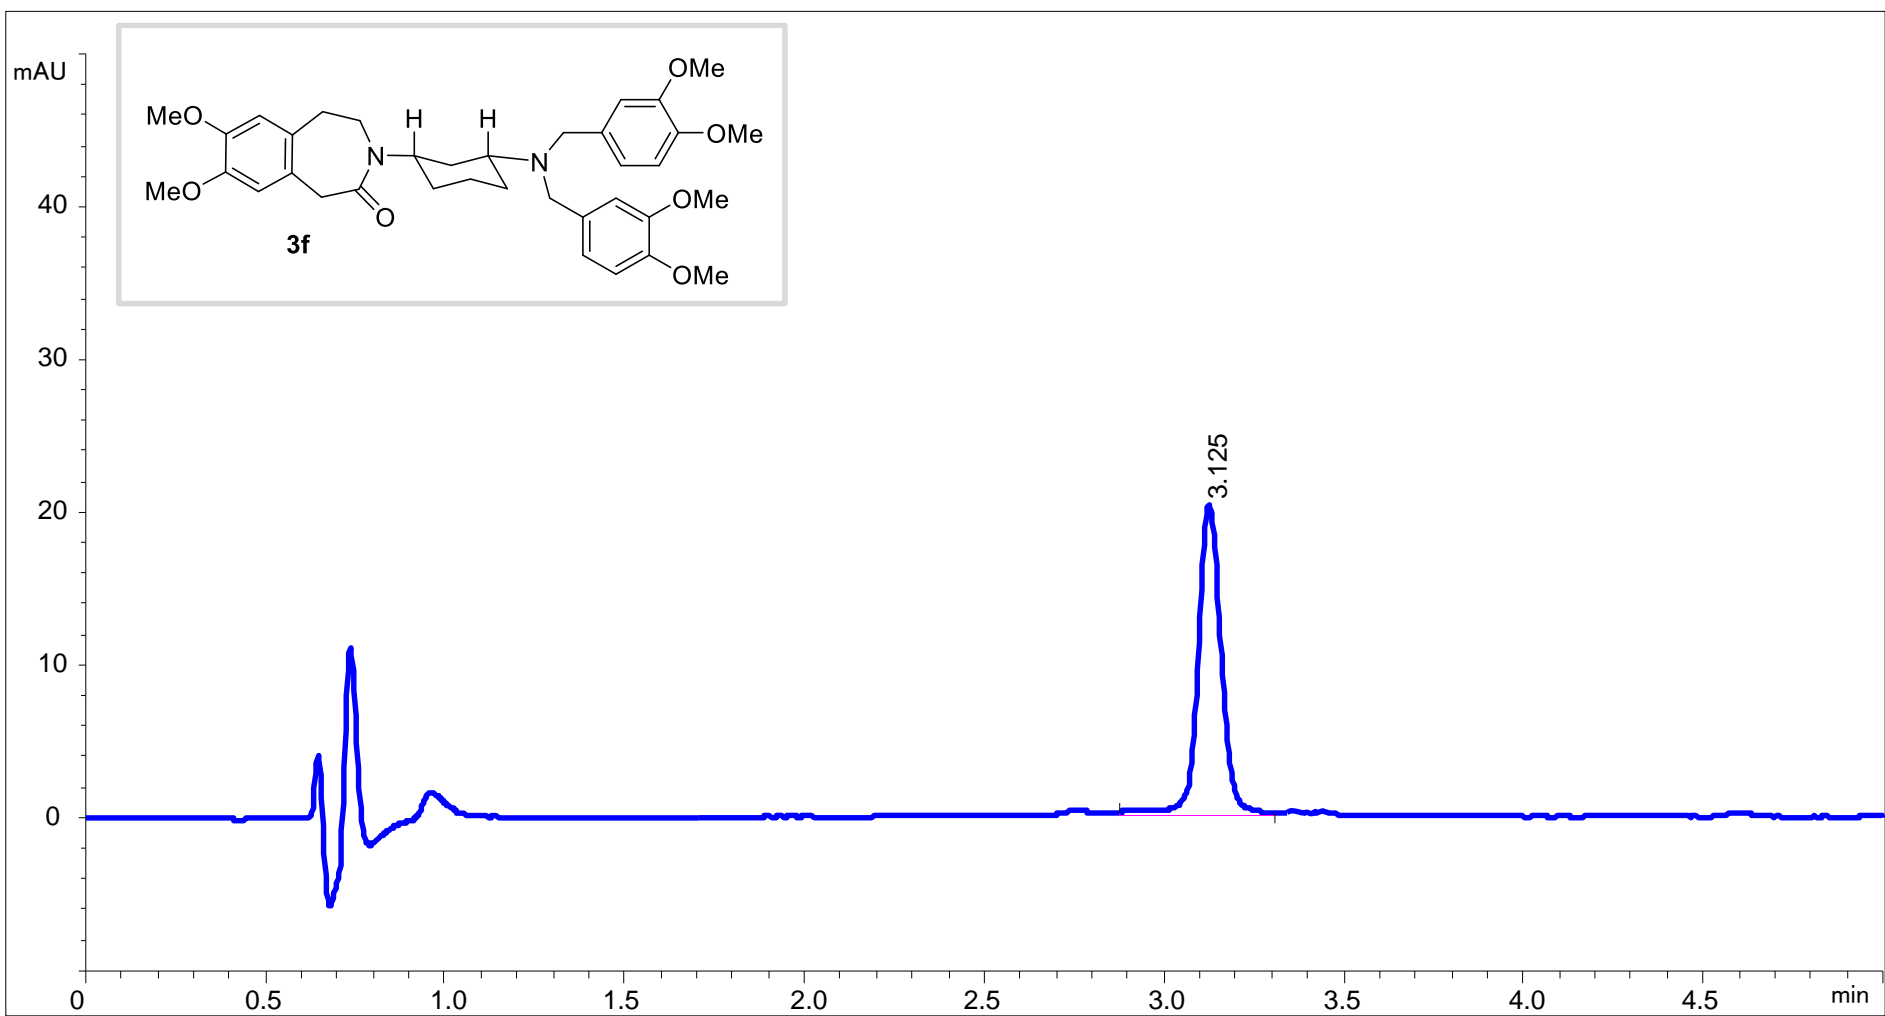

Figure S25. LC-DAD analysis of **3g**

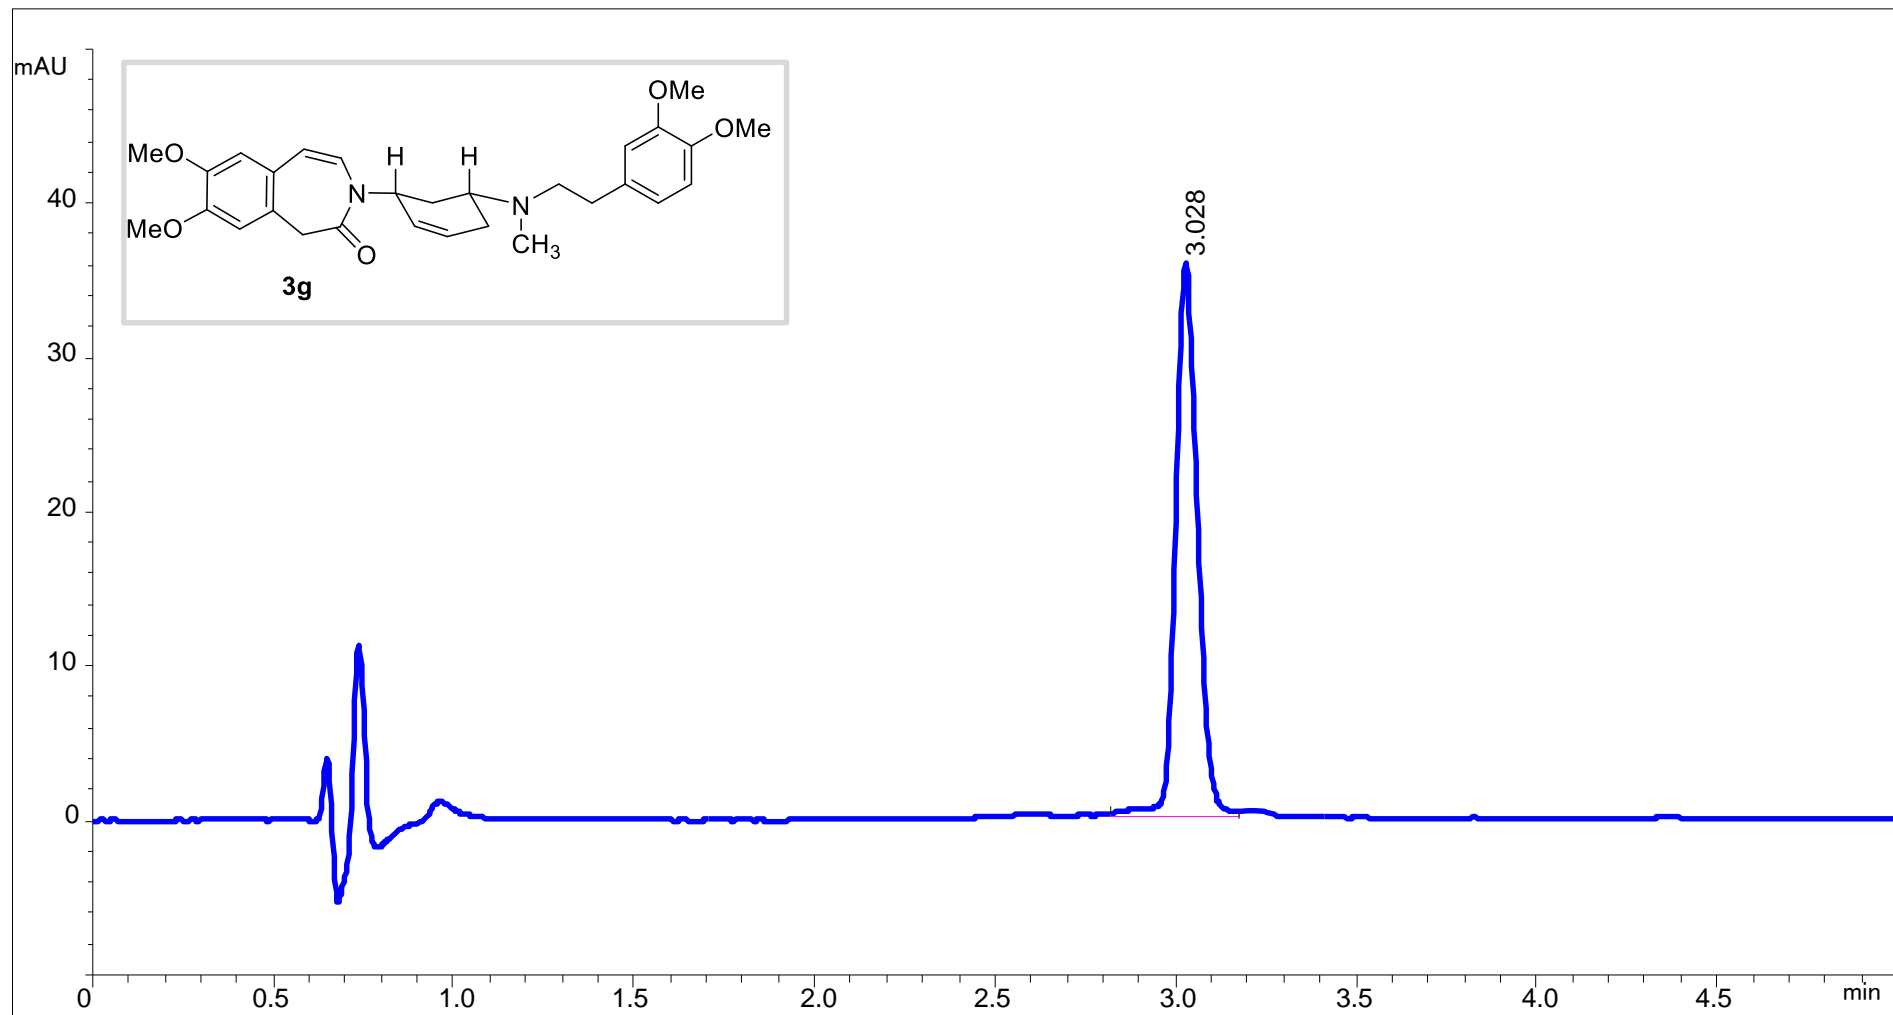

Supplement: ml8b00587_si_002.pdf [file ml8b00587_si_002.pdf]
